# Supplementary material for: Single-Cell Transcriptional Landscape Reveals the Regulatory Network and Its Heterogeneity of Renal Mitochondrial Damages in Diabetic Kidney Disease
Source: Int J Mol Sci. 2023 Aug 31;24(17):13502. doi: 10.3390/ijms241713502 (PMC10487965; doi:10.3390/ijms241713502)
Supplement: Supplementary file 1 [file ijms-24-13502-s001.zip]

Archive with 7 entries (7 files):
- ijms-2570725-supplementary.pdf
- Table S1.xlsx
- Table S2.xlsx
- Table S3.xlsx
- Table S4.xlsx
- Table S5.xlsx
- Table S6.xlsx
