# Supplementary material for: Single-Cell Transcriptional Landscape Reveals the Regulatory Network and Its Heterogeneity of Renal Mitochondrial Damages in Diabetic Kidney Disease
Source: Int J Mol Sci. 2023 Aug 31;24(17):13502. doi: 10.3390/ijms241713502 (PMC10487965; doi:10.3390/ijms241713502)
Supplement: Supplementary file 1 [file ijms-24-13502-s001.zip › Table S1.xlsx]

## Sheet: mito.encode.gene
	S1	S2	S3	DLH	ALH	CD-IC	CD-PC	DCT	EnC	T Cell	B Cell	Mac	DC
mt-Atp8	1.66441	1.80666	1.51105	1.09751	1.34282	1.59256	1.27391	1.2588	0.895474	0.784775	0.892165	0.794061	1.34531
mt-Co1	5.08591	5.12657	4.96033	4.78147	5.13693	5.48351	5.27979	4.87077	4.80111	4.08423	4.75837	4.38825	4.78196
mt-Co2	4.83096	5.14679	4.84256	4.3647	4.82578	5.22542	4.73691	4.4508	4.23527	3.74855	4.27312	3.85474	4.53981
mt-Co3	5.13081	5.35694	5.04045	4.85152	5.04956	5.43994	5.21495	4.83459	5.08665	3.91035	4.94034	4.45917	4.81076
mt-Cytb	4.75453	5.06856	4.77178	4.33927	4.6785	4.95419	4.72133	4.50545	4.52364	3.29922	4.28266	3.83383	4.4042
mt-Nd1	4.02432	3.82506	3.8505	3.895	3.54648	4.42948	4.06508	3.56464	4.44898	2.67604	4.0957	3.77172	3.88685
mt-Nd2	3.52258	3.7257	3.48621	3.00769	3.24361	3.62425	3.33018	3.17617	3.22035	2.13566	2.95035	2.61931	3.12362
mt-Nd3	2.83658	2.78791	2.60572	2.12434	2.65153	3.18144	2.56449	2.40438	2.2897	1.52989	2.05132	1.57457	2.26592
mt-Nd4	4.29356	4.4691	4.16399	3.76985	4.15717	4.51424	4.15049	3.96465	4.08268	2.85124	3.78627	3.41807	3.91095
mt-Nd4l	2.95439	3.36075	2.75925	1.96031	2.80766	3.04831	2.45125	2.57211	1.56618	1.505	1.81957	1.34077	2.52316
mt-Nd5	3.09458	3.08826	2.91305	2.00918	2.48668	3.04119	2.33472	2.26888	1.79035	1.57642	2.00703	1.54448	2.57345
mt-Nd6	0.620036	1.15969	0.757836	0.344654	0.586356	0.640857	0.512357	0.563792	0.303507	0.316187	0.330405	0.160165	0.646937
Trnp1	0.00301737	0.00377053	0.000887278	0.217177	0.0242205	0.00412028	0.00988778	0.0180971	0	0.0701811	0	0	0
Trnt1	0.351298	0.252779	0.364443	0.246051	0.364348	0.258325	0.264191	0.312031	0.241589	0.426467	0.378461	0.199283	0.309873
