# Supplementary material for: Single-Cell Transcriptional Landscape Reveals the Regulatory Network and Its Heterogeneity of Renal Mitochondrial Damages in Diabetic Kidney Disease
Source: Int J Mol Sci. 2023 Aug 31;24(17):13502. doi: 10.3390/ijms241713502 (PMC10487965; doi:10.3390/ijms241713502)
Supplement: Supplementary file 1 [file ijms-24-13502-s001.zip › Table S2.xlsx]

## Sheet: celltype.new.percent.mt
Celltype	mean.percent.mt
CD-IC	10.7272
S2	9.5052
S1	7.89254
CD-PC	7.84889
S3	7.28958
ALH	7.19505
EnC	6.27351
DCT	5.71893
DC	5.68392
B Cell	5.37517
DLH	5.31116
Mac	3.53006
T Cell	2.2529
