# Supplementary material for: Single-Cell Transcriptional Landscape Reveals the Regulatory Network and Its Heterogeneity of Renal Mitochondrial Damages in Diabetic Kidney Disease
Source: Int J Mol Sci. 2023 Aug 31;24(17):13502. doi: 10.3390/ijms241713502 (PMC10487965; doi:10.3390/ijms241713502)
Supplement: Supplementary file 1 [file ijms-24-13502-s001.zip › Table S3.xlsx]

## Sheet: nuclear.gene.sets
Mitochondrial central dogma	mtDNA maintenance	mtDNA replication	mtDNA nucleoid	mtDNA repair	mtDNA modifications	mtDNA stability and decay	mtRNA metabolism	Transcription	mtRNA granules	Polycistronic mtRNA processing	mt-tRNA modifications	mt-rRNA modifications	mt-mRNA modifications	mtRNA stability and decay	Translation	Mitochondrial ribosome	Mitochondrial ribosome assembly	Translation factors	mt-tRNA synthetases	fMet processing	Protein import, sorting and homeostasis	Protein import and sorting	TOM	SAM	MIA40	TIM22 carrier pathway	TIM23 presequence pathway	Import motor	OXA	Preprotein cleavage	Protein homeostasis	Proteases	Chaperones	OXPHOS	OXPHOS subunits	OXPHOS assembly factors	Complex I	CI subunits	CI assembly factors	Complex II	CII subunits	CII assembly factors	Complex III	CIII subunits	CIII assembly factors	Complex IV	CIV subunits	CIV assembly factors	Complex V
2810006K23Rik	Apex1	Dna2	Atad3a	Apex1	Mettl4	Endog	Alkbh1	Mrpl12	Alkbh1	Elac2	Alkbh1	Mettl15	Angel2	Endog	2810006K23Rik	Aurkaip1	Ddx28	2810006K23Rik	Aars2	Metap1d	Afg1l	Agk	Tomm20	Mtx1	Aifm1	Agk	Romo1	Dnajc15	Oxa1l	Immp1l	Afg1l	Afg1l	Dnaja3	Acad9	Atp5a1	Acad9	Acad9	mt-Nd1	Acad9	Sdha	Sdha	Sdhaf1	Bcs1l	Cyc1	Bcs1l	Cep89	Cox4i1	Cep89	Atp5a1
Aars2	Atad3a	Exog	Mterf1a	Exog		Exog	Angel2	Mterf1a	Ddx28	Fastk	Cdk5rap1	Mettl17	Mtpap	Fastk	Aars2	Chchd1	Dhx30	Coa3	Cars2	Mtfmt	Afg3l1	Aifm1	Tomm22	Mtx2	Chchd4	Timm22	Timm17a	Dnajc19		Immp2l	Afg3l1	Afg3l1	Dnlz	Aifm1	Atp5b	Aifm1	Aifm1	mt-Nd2	Aifm1	Sdhaf1	Sdhb	Sdhaf2	Cyc1	mt-Cytb	Lyrm7	Cmc1	Cox4i2	Cmc1	Atp5b
Alkbh1	Dna2	Lig3	Mterf1b	Lig3		Mgme1	Cdk5rap1	Mterf1b	Dhx30	Fastkd1	Dus2	Mettl5	Myg1	Fastkd1	Aurkaip1	Dap3	Eral1	Cox14	Dars2	Pdf	Afg3l2	Chchd4	Tomm34	Samm50	Gfer	Timm29	Timm17b	Grpel1		Mipep	Afg3l2	Afg3l2	Fkbp10	Atp5a1	Atp5c1	Atpaf1	Dmac1	mt-Nd3	Dmac1	Sdhaf2	Sdhc	Sdhaf3	Lyrm7	Uqcr10	Ttc19	Cmc2	Cox5a	Cmc2	Atp5c1
Angel2	Endog	Mgme1	Mterf2	Ogg1			Ddx28	Mtres1	Eral1	Fastkd2	Gtpbp3	Mrm1	Pde12	Fastkd2	Cars2	Gadd45gip1	Fastkd2	Gfm1	Ears2		Agk	Dnajc11	Tomm40				Timm21	Grpel2		Pmpca	Atad1	Atad1	Hspd1	Atp5b	Atp5d	Atpaf2	Dmac2	mt-Nd4	Dmac2	Sdhaf3	Sdhd	Sdhaf4	mt-Cytb	Uqcr11	Uqcc1	Coa3	Cox5b	Coa3	Atp5d
Apex1	Exog	Polg	Poldip2	Polb			Dhx30	Polrmt	Fastk	Fastkd3	Hsd17b10	Mrm2		Fastkd3	Chchd1	Mrpl1	Grsf1	Gfm2	Fars2		Aifm1	Dnajc15	Tomm40l				Timm23	Pam16		Pmpcb	Atp23	Atp23	Hspe1	Atp5c1	Atp5e	Atpsckmt	Ecsit	mt-Nd4l	Ecsit	Sdhaf4			Ttc19	Uqcrb	Uqcc2	Coa4	Cox6a1	Coa4	Atp5e
Atad3a	Lig3	Polg2	Polg	Polg			Dus2	Tefm	Fastkd1	Fastkd5	Mto1	Mrm3		Fastkd5	Coa3	Mrpl10	Gtpbp10	Hemk1	Gars		Atad1	Dnajc19	Tomm5				Timm50	Timm44		Uqcrc1	Casp3	Casp3	Maip1	Atp5d	Atp5g1	Bcs1l	Foxred1	mt-Nd5	Foxred1	Sdhb			Uqcc1	Uqcrc1	Uqcc3	Coa5	Cox6a2	Coa5	Atp5g1
Aurkaip1	Mettl4	Polrmt	Polg2	Primpol			Elac2	Tfam	Fastkd2	Grsf1	Nsun2	Mtpap		Grsf1	Cox14	Mrpl11	Malsu1	Mrpl58	Gatb		Atp23	Gfer	Tomm6							Uqcrc2	Casp8	Casp9	Nrd1	Atp5e	Atp5g2	Cep89	Lyrm2	mt-Nd6	Lyrm2	Sdhc			Uqcc2	Uqcrc2		Coa6	Cox6b1	Coa6	Atp5g2
Cars2	Mgme1	Rnaseh1	Polrmt	Recql4			Endog	Tfb2m	Fastkd5	Hsd17b10	Nsun3	Myg1		Lactb2	Dap3	Mrpl12	Mettl17	Mrrf	Gatc		Casp3	Grpel1	Tomm7							Xpnpep3	Casp9	Clpb	Phb	Atp5g1	Atp5g3	Cmc1	mt-Nd1	Ndufa1	Ndufaf1	Sdhd			Uqcc3	Uqcrfs1		Coa7	Cox6b2	Coa7	Atp5g3
Cdk5rap1	Mterf1a	Ssbp1	Ssbp1	Ung			Eral1	Top1mt	Grsf1	Prorp	Osgepl1	Ngrn		Lrpprc	Dars2	Mrpl13	Mief1	Mtif2	Hars2		Casp8	Grpel2	Tomm70a								Clpb	Clpp	Phb2	Atp5g2	Atp5h	Cmc2	mt-Nd2	Ndufa10	Ndufaf2				Uqcr10	Uqcrh		Coa8	Cox6c	Coa8	Atp5h
Chchd1	Mterf1b	Tfam	Tfam				Fastk		Hsd17b10	Ptcd2	Pus1	Nsun4		Mtpap	Ddx28	Mrpl14	Mpv17l2	Mtif3	Iars2		Casp9	Immp1l									Clpp	Clpx	Timm10	Atp5g3	Atp5j	Coa3	mt-Nd3	Ndufa11	Ndufaf3				Uqcr11	Uqcrq		Cox10	Cox7a1	Cox10	Atp5j
Coa3	Mterf2	Tfb2m	Twnk				Fastkd1		Mrm1	Tbrg4	Qtrt1	Rcc1l		Pde12	Dhx30	Mrpl15	Mrm2	Mtrf1	Kars		Chchd4	Immp2l									Clpx	Htra2	Timm10b	Atp5h	Atp5j2	Coa4	mt-Nd4	Ndufa12	Ndufaf4				Uqcrb			Cox11	Cox7a2	Cox11	Atp5j2
Cox14	Mutyh	Top1mt					Fastkd2		Mrm2	Trmt10c	Rpusd4	Rpusd3		Pnpt1	Ears2	Mrpl16	Mrm3	Mtrf1l	Lars2		Clpb	Mipep									Dnaja3	Ide	Timm13	Atp5j	Atp5k	Coa5	mt-Nd4l	Ndufa13	Ndufaf5				Uqcrc1			Cox14	Cox7a2l	Cox14	Atp5k
Dap3	Ogg1	Top3a					Fastkd3		Mrpl47	Ybey	Thg1l	Rpusd4		Rexo2	Eral1	Mrpl17	Mterf1a	Taco1	Mars2		Clpp	Mtx1									Dnajc4	Immp1l	Timm8a1	Atp5j2	Atp5l	Coa6	mt-Nd5	Ndufa2	Ndufaf6				Uqcrc2			Cox15	Cox7b	Cox15	Atp5l
Dars2	Pif1	Twnk					Fastkd5		Mrps7		Trit1	Tfb1m		Rnaseh1	Exd2	Mrpl18	Mterf3	Timm21	Nars2		Clpx	Mtx2									Dnlz	Immp2l	Timm8a2	Atp5k	Atp5md	Coa7	mt-Nd6	Ndufa3	Ndufaf7				Uqcrfs1			Cox16	Cox7c	Cox16	Atp5md
Ddx28	Polb						Grsf1		Mrps9		Trmt1	Trit1		Slirp	Fars2	Mrpl19	Mterf4	Tsfm	Pars2		Dnaja3	Nrd1									Fkbp10	Lactb	Timm8b	Atp5l	Atp5mpl	Coa8	Ndufa1	Ndufa5	Ndufaf8				Uqcrh			Cox17	Cox8a	Cox17	Atp5mpl
Dhx30	Poldip2						Gtpbp3		Mtpap		Trmt10c	Trmt2b		Supv3l1	Fastkd2	Mrpl2	Mtg1	Tufm	Qrsl1		Dnajc11	Oxa1l									Hspd1	Lap3	Timm9	Atp5md	Atp5o	Cox10	Ndufa10	Ndufa6	Nubpl				Uqcrq			Cox18	Cox8b	Cox18	Atp5o
Dna2	Polg						Hsd17b10		Noa1		Trmt2b	Trub2		Tbrg4	Gadd45gip1	Mrpl20	Mtg2		Rars2		Dnajc15	Pam16									Hspe1	Lonp1	Trap1	Atp5mpl	Atp5pb	Cox11	Ndufa11	Ndufa7	Timmdc1							Cox19	Cox8c	Cox19	Atp5pb
Dus2	Polg2						Lactb2		Prorp		Trmt5				Gars	Mrpl21	Ngrn		Sars2		Dnajc19	Pmpca									Htra2	Metap1d		Atp5o	Atpif1	Cox14	Ndufa12	Ndufa8	Tmem126a							Cox20	mt-Co1	Cox20	Atpaf1
Ears2	Polq						Lrpprc		Ptcd1		Trmu				Gatb	Mrpl22	Noa1		Tars2		Dnajc4	Pmpcb									Ide	Mipep		Atp5pb	Cox4i1	Cox15	Ndufa13	Ndufa9	Tmem126b							Cox4i1	mt-Co2	Higd1a	Atpaf2
Elac2	Polrmt						Mettl15		Ptcd2		Trnt1				Gatc	Mrpl23	Nsun4		Vars2		Dnlz	Romo1									Immp1l	Nln		Atpaf1	Cox4i2	Cox16	Ndufa2	Ndufab1	Tmem186							Cox4i2	mt-Co3	Pet100	Atpif1
Endog	Ppa2						Mettl17		Pus1		Yrdc				Gfm1	Mrpl24	Ptcd3		Wars2		Fkbp10	Samm50									Immp2l	Oma1		Atpaf2	Cox5a	Cox17	Ndufa3	Ndufb10	Tmem70							Cox5a	Ndufa4	Pet117	Atpsckmt
Eral1	Primpol						Mettl5		Rmnd1						Gfm2	Mrpl27	Rbfa		Yars2		Gfer	Timm10									Lactb	Parl		Atpif1	Cox5b	Cox18	Ndufa5	Ndufb11								Cox5b		Pnkd	Dmac2l
Exd2	Recql4						Mettl8		Rpusd3						Grsf1	Mrpl28	Tfb1m				Grpel1	Timm10b									Lap3	Pitrm1		Atpsckmt	Cox6a1	Cox19	Ndufa6	Ndufb2								Cox6a1		Sco1	Fmc1
Exog	Rnaseh1						Mrm1		Rpusd4						Gtpbp10	Mrpl3	Ybey				Grpel2	Timm13									Lonp1	Pmpca		Bcs1l	Cox6a2	Cox20	Ndufa7	Ndufb3								Cox6a2		Sco2	mt-Atp6
Fars2	Ssbp1						Mrm2		Supv3l1						Guf1	Mrpl30					Hspd1	Timm17a									Maip1	Pmpcb		Cep89	Cox6b1	Cox7a2l	Ndufa8	Ndufb4								Cox6b1		Smim20	mt-Atp8
Fastk	Tfam						Mrm3		Tfb1m						Hars2	Mrpl32					Hspe1	Timm17b									Metap1d	Spg7		Cmc1	Cox6b2	Dmac1	Ndufa9	Ndufb5								Cox6b2		Surf1	Tmem70
Fastkd1	Tfb2m						Mrpl12		Trmt10c						Hemk1	Mrpl33					Htra2	Timm21									Mipep	Usp30		Cmc2	Cox6c	Dmac2	Ndufab1	Ndufb6								Cox6c		Taco1
Fastkd2	Top1mt						Mrpl47		Trub2						Iars2	Mrpl34					Ide	Timm22									Mul1	Xpnpep3		Coa3	Cox7a1	Ecsit	Ndufaf1	Ndufb7								Cox7a1		Timm21
Fastkd3	Top3a						Mrps7								Kars	Mrpl35					Immp1l	Timm23									Nln	Yme1l1		Coa4	Cox7a2	Fmc1	Ndufaf2	Ndufb8								Cox7a2		Tmem177
Fastkd5	Twnk						Mrps9								Lars2	Mrpl36					Immp2l	Timm29									Nrd1			Coa5	Cox7a2l	Foxred1	Ndufaf3	Ndufb9								Cox7a2l
Gadd45gip1	Ung						Mterf1a								Lrpprc	Mrpl37					Lactb	Timm44									Oma1			Coa6	Cox7b	Higd1a	Ndufaf4	Ndufc1								Cox7b
Gars							Mterf1b								Malsu1	Mrpl38					Lap3	Timm50									Park7			Coa7	Cox7c	Higd2a	Ndufaf5	Ndufc2								Cox7c
Gatb							Mto1								Mars2	Mrpl39					Lonp1	Timm8a1									Parl			Coa8	Cox8a	Lyrm2	Ndufaf6	Ndufs1								Cox8a
Gatc							Mtpap								Metap1d	Mrpl4					Maip1	Timm8a2									Pdf			Cox10	Cox8b	Lyrm7	Ndufaf7	Ndufs2								Cox8b
Gfm1							Mtres1								Mettl17	Mrpl40					Metap1d	Timm8b									Phb			Cox11	Cox8c	Ndufaf1	Ndufaf8	Ndufs3								Cox8c
Gfm2							Myg1								Mief1	Mrpl41					Mipep	Timm9									Phb2			Cox14	Cyc1	Ndufaf2	Ndufb10	Ndufs4								Higd1a
Grsf1							Ngrn								Mpv17l2	Mrpl42					Mtx1	Tomm20									Pitrm1			Cox15	Cycs	Ndufaf3	Ndufb11	Ndufs5								mt-Co1
Gtpbp10							Noa1								Mrm2	Mrpl43					Mtx2	Tomm20l									Pmpca			Cox16	Cyct	Ndufaf4	Ndufb2	Ndufs6								mt-Co2
Gtpbp3							Nsun2								Mrm3	Mrpl44					Mul1	Tomm22									Pmpcb			Cox17	Dmac2l	Ndufaf5	Ndufb3	Ndufs7								mt-Co3
Guf1							Nsun3								Mrpl1	Mrpl45					Nln	Tomm34									Prss35			Cox18	Hccs	Ndufaf6	Ndufb4	Ndufs8								Ndufa4
Hars2							Nsun4								Mrpl10	Mrpl46					Nrd1	Tomm40									Spg7			Cox19	mt-Atp6	Ndufaf7	Ndufb5	Ndufv1								Pet100
Hemk1							Osgepl1								Mrpl11	Mrpl47					Oma1	Tomm40l									Stoml2			Cox20	mt-Atp8	Ndufaf8	Ndufb6	Ndufv2								Pet117
Hsd17b10							Pde12								Mrpl12	Mrpl48					Oxa1l	Tomm5									Timm10			Cox4i1	mt-Co1	Nubpl	Ndufb7	Ndufv3								Pnkd
Iars2							Pnpt1								Mrpl13	Mrpl49					Pam16	Tomm6									Timm10b			Cox4i2	mt-Co2	Pet100	Ndufb8									Sco1
Kars							Polrmt								Mrpl14	Mrpl50					Park7	Tomm7									Timm13			Cox5a	mt-Co3	Pet117	Ndufb9									Sco2
Lactb2							Ppa2								Mrpl15	Mrpl51					Parl	Tomm70a									Timm8a1			Cox5b	mt-Cytb	Pnkd	Ndufc1									Smim20
Lars2							Prorp								Mrpl16	Mrpl52					Pdf	Uqcrc1									Timm8a2			Cox6a1	mt-Nd1	Rab5if	Ndufc2									Surf1
Lig3							Ptcd1								Mrpl17	Mrpl53					Phb	Uqcrc2									Timm8b			Cox6a2	mt-Nd2	Sco1	Ndufs1									Taco1
Lrpprc							Ptcd2								Mrpl18	Mrpl54					Phb2	Xpnpep3									Timm9			Cox6b1	mt-Nd3	Sco2	Ndufs2									Timm21
Malsu1							Pus1								Mrpl19	Mrpl55					Pitrm1										Trap1			Cox6b2	mt-Nd4	Sdhaf1	Ndufs3									Tmem177
Mars2							Qtrt1								Mrpl2	Mrpl57					Pmpca										Usp30			Cox6c	mt-Nd4l	Sdhaf2	Ndufs4
Metap1d							Rcc1l								Mrpl20	Mrpl58					Pmpcb										Xpnpep3			Cox7a1	mt-Nd5	Sdhaf3	Ndufs5
Mettl15							Rexo2								Mrpl21	Mrpl9					Prss35										Yme1l1			Cox7a2	mt-Nd6	Sdhaf4	Ndufs6
Mettl17							Rmnd1								Mrpl22	Mrps10					Romo1													Cox7a2l	Ndufa1	Smim20	Ndufs7
Mettl4							Rnaseh1								Mrpl23	Mrps11					Samm50													Cox7b	Ndufa10	Surf1	Ndufs8
Mettl5							Rpusd3								Mrpl24	Mrps12					Spg7													Cox7c	Ndufa11	Taco1	Ndufv1
Mettl8							Rpusd4								Mrpl27	Mrps14					Stoml2													Cox8a	Ndufa12	Timm21	Ndufv2
Mgme1							Slirp								Mrpl28	Mrps15					Timm10													Cox8b	Ndufa13	Timmdc1	Ndufv3
Mief1							Supv3l1								Mrpl3	Mrps16					Timm10b													Cox8c	Ndufa2	Tmem126a	Nubpl
Mpv17l2							Tbrg4								Mrpl30	Mrps17					Timm13													Cyc1	Ndufa3	Tmem126b	Timmdc1
Mrm1							Tefm								Mrpl32	Mrps18a					Timm17a													Cycs	Ndufa4	Tmem177	Tmem126a
Mrm2							Tfam								Mrpl33	Mrps18b					Timm17b													Cyct	Ndufa5	Tmem186	Tmem126b
Mrm3							Tfb1m								Mrpl34	Mrps18c					Timm21													Dmac1	Ndufa6	Tmem70	Tmem186
Mrpl1							Tfb2m								Mrpl35	Mrps2					Timm22													Dmac2	Ndufa7	Ttc19	Tmem70
Mrpl10							Thg1l								Mrpl36	Mrps21					Timm23													Dmac2l	Ndufa8	Uqcc1
Mrpl11							Top1mt								Mrpl37	Mrps22					Timm29													Ecsit	Ndufa9	Uqcc2
Mrpl12							Trit1								Mrpl38	Mrps23					Timm44													Fmc1	Ndufab1	Uqcc3
Mrpl13							Trmt1								Mrpl39	Mrps24					Timm50													Foxred1	Ndufb10
Mrpl14							Trmt10c								Mrpl4	Mrps25					Timm8a1													Hccs	Ndufb11
Mrpl15							Trmt2b								Mrpl40	Mrps26					Timm8a2													Higd1a	Ndufb2
Mrpl16							Trmt5								Mrpl41	Mrps27					Timm8b													Higd2a	Ndufb3
Mrpl17							Trmu								Mrpl42	Mrps28					Timm9													Lyrm2	Ndufb4
Mrpl18							Trnt1								Mrpl43	Mrps30					Tomm20													Lyrm7	Ndufb5
Mrpl19							Trub2								Mrpl44	Mrps31					Tomm20l													mt-Atp6	Ndufb6
Mrpl2							Ybey								Mrpl45	Mrps33					Tomm22													mt-Atp8	Ndufb7
Mrpl20							Yrdc								Mrpl46	Mrps34					Tomm34													mt-Co1	Ndufb8
Mrpl21															Mrpl47	Mrps35					Tomm40													mt-Co2	Ndufb9
Mrpl22															Mrpl48	Mrps36					Tomm40l													mt-Co3	Ndufc1
Mrpl23															Mrpl49	Mrps5					Tomm5													mt-Cytb	Ndufc2
Mrpl24															Mrpl50	Mrps6					Tomm6													mt-Nd1	Ndufs1
Mrpl27															Mrpl51	Mrps7					Tomm7													mt-Nd2	Ndufs2
Mrpl28															Mrpl52	Mrps9					Tomm70a													mt-Nd3	Ndufs3
Mrpl3															Mrpl53	Ptcd3					Trap1													mt-Nd4	Ndufs4
Mrpl30															Mrpl54						Uqcrc1													mt-Nd4l	Ndufs5
Mrpl32															Mrpl55						Uqcrc2													mt-Nd5	Ndufs6
Mrpl33															Mrpl57						Usp30													mt-Nd6	Ndufs7
Mrpl34															Mrpl58						Xpnpep3													Ndufa1	Ndufs8
Mrpl35															Mrpl9						Yme1l1													Ndufa10	Ndufv1
Mrpl36															Mrps10																			Ndufa11	Ndufv2
Mrpl37															Mrps11																			Ndufa12	Ndufv3
Mrpl38															Mrps12																			Ndufa13	Sdha
Mrpl39															Mrps14																			Ndufa2	Sdhb
Mrpl4															Mrps15																			Ndufa3	Sdhc
Mrpl40															Mrps16																			Ndufa4	Sdhd
Mrpl41															Mrps17																			Ndufa5	Uqcr10
Mrpl42															Mrps18a																			Ndufa6	Uqcr11
Mrpl43															Mrps18b																			Ndufa7	Uqcrb
Mrpl44															Mrps18c																			Ndufa8	Uqcrc1
Mrpl45															Mrps2																			Ndufa9	Uqcrc2
Mrpl46															Mrps21																			Ndufab1	Uqcrfs1
Mrpl47															Mrps22																			Ndufaf1	Uqcrh
Mrpl48															Mrps23																			Ndufaf2	Uqcrq
Mrpl49															Mrps24																			Ndufaf3
Mrpl50															Mrps25																			Ndufaf4
Mrpl51															Mrps26																			Ndufaf5
Mrpl52															Mrps27																			Ndufaf6
Mrpl53															Mrps28																			Ndufaf7
Mrpl54															Mrps30																			Ndufaf8
Mrpl55															Mrps31																			Ndufb10
Mrpl57															Mrps33																			Ndufb11
Mrpl58															Mrps34																			Ndufb2
Mrpl9															Mrps35																			Ndufb3
Mrps10															Mrps36																			Ndufb4
Mrps11															Mrps5																			Ndufb5
Mrps12															Mrps6																			Ndufb6
Mrps14															Mrps7																			Ndufb7
Mrps15															Mrps9																			Ndufb8
Mrps16															Mrrf																			Ndufb9
Mrps17															Mterf1a																			Ndufc1
Mrps18a															Mterf3																			Ndufc2
Mrps18b															Mterf4																			Ndufs1
Mrps18c															Mtfmt																			Ndufs2
Mrps2															Mtg1																			Ndufs3
Mrps21															Mtg2																			Ndufs4
Mrps22															Mtif2																			Ndufs5
Mrps23															Mtif3																			Ndufs6
Mrps24															Mtres1																			Ndufs7
Mrps25															Mtrf1																			Ndufs8
Mrps26															Mtrf1l																			Ndufv1
Mrps27															Nars2																			Ndufv2
Mrps28															Ngrn																			Ndufv3
Mrps30															Noa1																			Nubpl
Mrps31															Nsun4																			Pet100
Mrps33															Oxa1l																			Pet117
Mrps34															Pars2																			Pnkd
Mrps35															Pdf																			Rab5if
Mrps36															Ppa2																			Sco1
Mrps5															Ptcd3																			Sco2
Mrps6															Pusl1																			Sdha
Mrps7															Qrsl1																			Sdhaf1
Mrps9															Rars2																			Sdhaf2
Mrrf															Rbfa																			Sdhaf3
Mterf1a															Rmnd1																			Sdhaf4
Mterf1b															Sars2																			Sdhb
Mterf2															Slirp																			Sdhc
Mterf3															Taco1																			Sdhd
Mterf4															Tars2																			Smim20
Mtfmt															Tfb1m																			Surf1
Mtg1															Timm21																			Taco1
Mtg2															Tsfm																			Timm21
Mtif2															Tufm																			Timmdc1
Mtif3															Vars2																			Tmem126a
Mto1															Wars2																			Tmem126b
Mtpap															Yars2																			Tmem177
Mtres1															Ybey																			Tmem186
Mtrf1																																		Tmem70
Mtrf1l																																		Ttc19
Mutyh																																		Uqcc1
Myg1																																		Uqcc2
Nars2																																		Uqcc3
Ngrn																																		Uqcr10
Noa1																																		Uqcr11
Nsun2																																		Uqcrb
Nsun3																																		Uqcrc1
Nsun4																																		Uqcrc2
Ogg1																																		Uqcrfs1
Osgepl1																																		Uqcrh
Oxa1l																																		Uqcrq
Pars2
Pde12
Pdf
Pif1
Pnpt1
Polb
Poldip2
Polg
Polg2
Polq
Polrmt
Ppa2
Primpol
Prorp
Ptcd1
Ptcd2
Ptcd3
Pus1
Pusl1
Qrsl1
Qtrt1
Rars2
Rbfa
Rcc1l
Recql4
Rexo2
Rmnd1
Rnaseh1
Rpusd3
Rpusd4
Sars2
Slirp
Ssbp1
Supv3l1
Taco1
Tars2
Tbrg4
Tefm
Tfam
Tfb1m
Tfb2m
Thg1l
Timm21
Top1mt
Top3a
Trit1
Trmt1
Trmt10c
Trmt2b
Trmt5
Trmu
Trnt1
Trub2
Tsfm
Tufm
Twnk
Ung
Vars2
Wars2
Yars2
Ybey
Yrdc
[truncated: 106 more columns]
