# Supplementary material for: Single-Cell Transcriptional Landscape Reveals the Regulatory Network and Its Heterogeneity of Renal Mitochondrial Damages in Diabetic Kidney Disease
Source: Int J Mol Sci. 2023 Aug 31;24(17):13502. doi: 10.3390/ijms241713502 (PMC10487965; doi:10.3390/ijms241713502)
Supplement: Supplementary file 1 [file ijms-24-13502-s001.zip › Table S4.xlsx]

## Sheet: DLH
	ID	Description	GeneRatio	BgRatio	pvalue	p.adjust	qvalue	geneID	Count	source
Glutathione.metabolism	Glutathione.metabolism	Glutathione.metabolism	9/73	48/1665	0.000153739	0.00507338	0.00404576	Gpx3/Ggt1/Gss/Gstm5/Gstt2/Gclm/Gclc/Idh1/Gsta3	9	Intersective gene
Taurine.and.hypotaurine.metabolism	Taurine.and.hypotaurine.metabolism	Taurine.and.hypotaurine.metabolism	3/73	10/1665	0.00777267	0.123778	0.0987063	Ggt1/Csad/Cdo1	3	Intersective gene
ROS.elimination	ROS.elimination	ROS.elimination	5/73	32/1665	0.0112525	0.123778	0.0987063	Gsta2/Gstm5/Gsta4/Prdx1/Gsta3	5	Intersective gene
Biosynthesis.of.unsaturated.fatty.acids	Biosynthesis.of.unsaturated.fatty.acids	Biosynthesis.of.unsaturated.fatty.acids	4/73	26/1665	0.0244449	0.188924	0.150657	Acot4/Acot1/Acox1/Pecr	4	Intersective gene
Alanine..aspartate.and.glutamate.metabolism	Alanine..aspartate.and.glutamate.metabolism	Alanine..aspartate.and.glutamate.metabolism	4/73	29/1665	0.035182	0.188924	0.150657	Ass1/Acy3/Aspa/Glul	4	Intersective gene
Citrate.cycle..TCA.cycle.	Citrate.cycle..TCA.cycle.	Citrate.cycle..TCA.cycle.	4/73	30/1665	0.0392828	0.188924	0.150657	Pck1/Mdh1/Aco1/Idh1	4	Intersective gene
Glycine..serine.and.threonine.metabolism	Glycine..serine.and.threonine.metabolism	Glycine..serine.and.threonine.metabolism	4/73	31/1665	0.0436471	0.188924	0.150657	Pipox/Dao/Cbs/Cth	4	Intersective gene
Histidine.metabolism	Histidine.metabolism	Histidine.metabolism	4/73	32/1665	0.0482749	0.188924	0.150657	Acy3/Ddc/Aspa/Uroc1	4	Intersective gene
ROS.GSEA.	ROS.GSEA.	ROS.GSEA.	5/73	47/1665	0.0515247	0.188924	0.150657	Gpx3/Nqo1/Gclm/Gclc/Prdx1	5	Intersective gene
Tyrosine.metabolism	Tyrosine.metabolism	Tyrosine.metabolism	4/73	40/1665	0.0945648	0.30176	0.240638	Fah/Hgd/Ddc/Adh5	4	Intersective gene
Arachidonic.acid.metabolism	Arachidonic.acid.metabolism	Arachidonic.acid.metabolism	5/73	57/1665	0.100587	0.30176	0.240638	Gpx3/Cyp4a31/Ggt1/Cyp4a10/Cbr1	5	Intersective gene
Glycolysis...Gluconeogenesis	Glycolysis...Gluconeogenesis	Glycolysis...Gluconeogenesis	5/73	63/1665	0.138337	0.380428	0.303372	Aldob/Fbp1/Acss2/Pck1/Adh5	5	Intersective gene
Phenylalanine.metabolism	Phenylalanine.metabolism	Phenylalanine.metabolism	2/73	19/1665	0.201232	0.481476	0.383952	Ddc/Pah	2	Intersective gene
Nitrogen.metabolism	Nitrogen.metabolism	Nitrogen.metabolism	2/73	20/1665	0.217599	0.481476	0.383952	Cth/Glul	2	Intersective gene
Cysteine.and.methionine.metabolism	Cysteine.and.methionine.metabolism	Cysteine.and.methionine.metabolism	3/73	37/1665	0.218853	0.481476	0.383952	Cbs/Cth/Cdo1	3	Intersective gene
Glycerolipid.metabolism	Glycerolipid.metabolism	Glycerolipid.metabolism	3/73	47/1665	0.340116	0.701489	0.559401	Tkfc/Gk/Dgkh	3	Intersective gene
Hypoxia	Hypoxia	Hypoxia	4/73	73/1665	0.399368	0.757825	0.604326	Psmd8/Psmd12/Psmd9/Psmb5	4	Intersective gene
Arginine.and.proline.metabolism	Arginine.and.proline.metabolism	Arginine.and.proline.metabolism	3/73	53/1665	0.413359	0.757825	0.604326	Ass1/Dao/Glul	3	Intersective gene
Angiogenesis	Angiogenesis	Angiogenesis	2/73	34/1665	0.444327	0.771726	0.615411	Tnfrsf21/Lrpap1	2	Intersective gene
alpha.Linolenic.acid.metabolism	alpha.Linolenic.acid.metabolism	alpha.Linolenic.acid.metabolism	1/73	19/1665	0.575393	0.910355	0.725961	Acox1	1	Intersective gene
Apoptosis	Apoptosis	Apoptosis	3/73	70/1665	0.602286	0.910355	0.725961	Cth/Btg2/Atf3	3	Intersective gene
beta.Alanine.metabolism	beta.Alanine.metabolism	beta.Alanine.metabolism	1/73	22/1665	0.62945	0.910355	0.725961	Upb1	1	Intersective gene
Inflammation	Inflammation	Inflammation	4/73	98/1665	0.63449	0.910355	0.725961	Hpn/Nkg7/Atp2a2/Btg2	4	Intersective gene
Purine.metabolism	Purine.metabolism	Purine.metabolism	6/73	161/1665	0.725634	0.982008	0.783101	Entpd5/Nt5e/Aprt/Pde4d/Adk/Ttr	6	Intersective gene
Tryptophan.metabolism	Tryptophan.metabolism	Tryptophan.metabolism	1/73	41/1665	0.844508	0.982008	0.783101	Ddc	1	Intersective gene
Lysine.degradation	Lysine.degradation	Lysine.degradation	1/73	42/1665	0.851497	0.982008	0.783101	Pipox	1	Intersective gene
N.Glycan.biosynthesis	N.Glycan.biosynthesis	N.Glycan.biosynthesis	1/73	45/1665	0.870659	0.982008	0.783101	Man1a	1	Intersective gene
JAK.STAT	JAK.STAT	JAK.STAT	2/73	79/1665	0.872426	0.982008	0.783101	Ghr/Prlr	2	Intersective gene
Steroid.hormone.biosynthesis	Steroid.hormone.biosynthesis	Steroid.hormone.biosynthesis	1/73	52/1665	0.906396	0.982008	0.783101	Cyp7b1	1	Intersective gene
TGF-β	TGF-β	TGF-β	1/73	57/1665	0.925766	0.982008	0.783101	Id2	1	Intersective gene
AGE.RAGE	AGE.RAGE	AGE.RAGE	1/73	71/1665	0.961369	0.982008	0.783101	Nox4	1	Intersective gene
Glycerophospholipid.metabolism	Glycerophospholipid.metabolism	Glycerophospholipid.metabolism	1/73	78/1665	0.972193	0.982008	0.783101	Dgkh	1	Intersective gene
Oxidative.phosphorylation	Oxidative.phosphorylation	Oxidative.phosphorylation	2/73	129/1665	0.982008	0.982008	0.783101	Atp6v0a4/Ppa1	2	Intersective gene
Collagen_formation	Collagen_formation	Collagen_formation	5/38	67/1665	0.0162443	0.454842	0.454842	Col4a4/Plod2/Col4a3/Col4a5/Col18a1	5	Exclusive gene
Steroid.biosynthesis	Steroid.biosynthesis	Steroid.biosynthesis	2/38	17/1665	0.0556168	0.656775	0.656775	Sqle/Dhcr24	2	Exclusive gene
Glycerolipid.metabolism1	Glycerolipid.metabolism	Glycerolipid.metabolism	3/38	47/1665	0.0893269	0.656775	0.656775	Akr1a1/Akr1b3/Plpp3	3	Exclusive gene
Glutathione.metabolism1	Glutathione.metabolism	Glutathione.metabolism	3/38	48/1665	0.093825	0.656775	0.656775	Oplah/Gstm1/Sms	3	Exclusive gene
ROS.elimination1	ROS.elimination	ROS.elimination	2/38	32/1665	0.164267	0.843328	0.843328	Sod3/Gstm1	2	Exclusive gene
Angiogenesis1	Angiogenesis	Angiogenesis	2/38	34/1665	0.180713	0.843328	0.843328	App/Fstl1	2	Exclusive gene
Valine..leucine.and.isoleucine.biosynthesis	Valine..leucine.and.isoleucine.biosynthesis	Valine..leucine.and.isoleucine.biosynthesis	1/38	11/1665	0.224878	0.868052	0.868052	Bcat1	1	Exclusive gene
ROS.GSEA.1	ROS.GSEA.	ROS.GSEA.	2/38	47/1665	0.291492	0.868052	0.868052	Ftl1/Atox1	2	Exclusive gene
Valine..leucine.and.isoleucine.degradation	Valine..leucine.and.isoleucine.degradation	Valine..leucine.and.isoleucine.degradation	2/38	47/1665	0.291492	0.868052	0.868052	Hmgcs1/Bcat1	2	Exclusive gene
EMT	EMT	EMT	1/38	16/1665	0.310019	0.868052	0.868052	Dsp	1	Exclusive gene
TGF-β1	TGF-β	TGF-β	2/38	57/1665	0.376445	0.888733	0.888733	Rhoa/Tjp1	2	Exclusive gene
beta.Alanine.metabolism1	beta.Alanine.metabolism	beta.Alanine.metabolism	1/38	22/1665	0.400218	0.888733	0.888733	Sms	1	Exclusive gene
Glycolysis...Gluconeogenesis1	Glycolysis...Gluconeogenesis	Glycolysis...Gluconeogenesis	2/38	63/1665	0.425643	0.888733	0.888733	Akr1a1/Pkm	2	Exclusive gene
Apoptosis1	Apoptosis	Apoptosis	2/38	70/1665	0.480565	0.888733	0.888733	Etf1/App	2	Exclusive gene
PI3K_AKT_mTOR	PI3K_AKT_mTOR	PI3K_AKT_mTOR	2/38	73/1665	0.503164	0.888733	0.888733	Cab39l/Arf1	2	Exclusive gene
Glycine..serine.and.threonine.metabolism1	Glycine..serine.and.threonine.metabolism	Glycine..serine.and.threonine.metabolism	1/38	31/1665	0.514371	0.888733	0.888733	Phgdh	1	Exclusive gene
Cysteine.and.methionine.metabolism1	Cysteine.and.methionine.metabolism	Cysteine.and.methionine.metabolism	1/38	37/1665	0.578406	0.888733	0.888733	Sms	1	Exclusive gene
Tryptophan.metabolism1	Tryptophan.metabolism	Tryptophan.metabolism	1/38	41/1665	0.616446	0.888733	0.888733	Inmt	1	Exclusive gene
Lysine.degradation1	Lysine.degradation	Lysine.degradation	1/38	42/1665	0.62542	0.888733	0.888733	Plod2	1	Exclusive gene
N.Glycan.biosynthesis1	N.Glycan.biosynthesis	N.Glycan.biosynthesis	1/38	45/1665	0.651135	0.888733	0.888733	Mgat4a	1	Exclusive gene
Inflammation1	Inflammation	Inflammation	2/38	98/1665	0.66655	0.888733	0.888733	Cd82/Hbegf	2	Exclusive gene
Arginine.and.proline.metabolism1	Arginine.and.proline.metabolism	Arginine.and.proline.metabolism	1/38	53/1665	0.711592	0.905662	0.905662	Sms	1	Exclusive gene
Hypoxia1	Hypoxia	Hypoxia	1/38	73/1665	0.821534	0.910701	0.910701	Ubb	1	Exclusive gene
NFKB1	NFKB1	NFKB1	1/38	77/1665	0.837988	0.910701	0.910701	Cxcl12	1	Exclusive gene
Glycerophospholipid.metabolism1	Glycerophospholipid.metabolism	Glycerophospholipid.metabolism	1/38	78/1665	0.841865	0.910701	0.910701	Plpp3	1	Exclusive gene
JAK.STAT1	JAK.STAT	JAK.STAT	1/38	79/1665	0.845651	0.910701	0.910701	Egf	1	Exclusive gene
Purine.metabolism1	Purine.metabolism	Purine.metabolism	2/38	161/1665	0.896425	0.929625	0.929625	Nme1/Pkm	2	Exclusive gene
Oxidative.phosphorylation1	Oxidative.phosphorylation	Oxidative.phosphorylation	1/38	129/1665	0.954972	0.954972	0.954972	Atp6v1e1	1	Exclusive gene

## Sheet: CD-PC
	ID	Description	GeneRatio	BgRatio	pvalue	p.adjust	qvalue	geneID	Count	source
Glutathione.metabolism	Glutathione.metabolism	Glutathione.metabolism	4/42	48/1665	0.0304671	0.497735	0.486508	Gstm2/Gsta3/Gstm1/Gpx3	4	Intersective gene
ROS.elimination	ROS.elimination	ROS.elimination	3/42	32/1665	0.0445609	0.497735	0.486508	Gstm2/Gsta3/Gstm1	3	Intersective gene
EMT	EMT	EMT	2/42	16/1665	0.0596226	0.497735	0.486508	Dsp/Cdh1	2	Intersective gene
Glycolysis...Gluconeogenesis	Glycolysis...Gluconeogenesis	Glycolysis...Gluconeogenesis	4/42	63/1665	0.071105	0.497735	0.486508	Pgam2/Pgam1/Pgk1/Adh1	4	Intersective gene
Apoptosis	Apoptosis	Apoptosis	4/42	70/1665	0.0965122	0.540468	0.528277	Anxa1/Cav1/Emp1/Btg2	4	Intersective gene
Taurine.and.hypotaurine.metabolism	Taurine.and.hypotaurine.metabolism	Taurine.and.hypotaurine.metabolism	1/42	10/1665	0.226005	0.856792	0.837466	Cdo1	1	Intersective gene
Collagen_formation	Collagen_formation	Collagen_formation	3/42	67/1665	0.237205	0.856792	0.837466	Pcolce/Itga6/Col18a1	3	Intersective gene
AGE.RAGE	AGE.RAGE	AGE.RAGE	3/42	71/1665	0.264792	0.856792	0.837466	Egr1/Tgfbr2/Jun	3	Intersective gene
ROS.GSEA.	ROS.GSEA.	ROS.GSEA.	2/42	47/1665	0.333833	0.856792	0.837466	Junb/Gpx3	2	Intersective gene
Nitrogen.metabolism	Nitrogen.metabolism	Nitrogen.metabolism	1/42	20/1665	0.401874	0.856792	0.837466	Car2	1	Intersective gene
TGF-β	TGF-β	TGF-β	2/42	57/1665	0.425548	0.856792	0.837466	Junb/Cdh1	2	Intersective gene
Biosynthesis.of.unsaturated.fatty.acids	Biosynthesis.of.unsaturated.fatty.acids	Biosynthesis.of.unsaturated.fatty.acids	1/42	26/1665	0.487971	0.856792	0.837466	Scd2	1	Intersective gene
Citrate.cycle..TCA.cycle.	Citrate.cycle..TCA.cycle.	Citrate.cycle..TCA.cycle.	1/42	30/1665	0.538516	0.856792	0.837466	Mdh1	1	Intersective gene
Glycine..serine.and.threonine.metabolism	Glycine..serine.and.threonine.metabolism	Glycine..serine.and.threonine.metabolism	1/42	31/1665	0.550371	0.856792	0.837466	Shmt1	1	Intersective gene
Histidine.metabolism	Histidine.metabolism	Histidine.metabolism	1/42	32/1665	0.561928	0.856792	0.837466	Uroc1	1	Intersective gene
Purine.metabolism	Purine.metabolism	Purine.metabolism	4/42	161/1665	0.591326	0.856792	0.837466	Papss1/Prps2/Nme1/Pde8b	4	Intersective gene
Cysteine.and.methionine.metabolism	Cysteine.and.methionine.metabolism	Cysteine.and.methionine.metabolism	1/42	37/1665	0.615501	0.856792	0.837466	Cdo1	1	Intersective gene
Tyrosine.metabolism	Tyrosine.metabolism	Tyrosine.metabolism	1/42	40/1665	0.644516	0.856792	0.837466	Adh1	1	Intersective gene
Oxidative.phosphorylation	Oxidative.phosphorylation	Oxidative.phosphorylation	3/42	129/1665	0.644802	0.856792	0.837466	Atp6v1e1/Atp6v1d/Atp6v1a	3	Intersective gene
Tryptophan.metabolism	Tryptophan.metabolism	Tryptophan.metabolism	1/42	41/1665	0.653704	0.856792	0.837466	Inmt	1	Intersective gene
N.Glycan.biosynthesis	N.Glycan.biosynthesis	N.Glycan.biosynthesis	1/42	45/1665	0.688192	0.856792	0.837466	St6gal1	1	Intersective gene
Inflammation	Inflammation	Inflammation	2/42	98/1665	0.720045	0.856792	0.837466	Cd82/Btg2	2	Intersective gene
Steroid.hormone.biosynthesis	Steroid.hormone.biosynthesis	Steroid.hormone.biosynthesis	1/42	52/1665	0.740653	0.856792	0.837466	Hsd11b2	1	Intersective gene
Arginine.and.proline.metabolism	Arginine.and.proline.metabolism	Arginine.and.proline.metabolism	1/42	53/1665	0.747406	0.856792	0.837466	Ckb	1	Intersective gene
Arachidonic.acid.metabolism	Arachidonic.acid.metabolism	Arachidonic.acid.metabolism	1/42	57/1665	0.772743	0.856792	0.837466	Gpx3	1	Intersective gene
Autophagy	Autophagy	Autophagy	1/42	61/1665	0.795592	0.856792	0.837466	Camkk2	1	Intersective gene
PI3K_AKT_mTOR	PI3K_AKT_mTOR	PI3K_AKT_mTOR	1/42	73/1665	0.851497	0.87354	0.853836	Mknk2	1	Intersective gene
JAK.STAT	JAK.STAT	JAK.STAT	1/42	79/1665	0.87354	0.87354	0.853836	Egf	1	Intersective gene
TGF-β1	TGF-β	TGF-β	44702	57/1665	0.000526946	0.00843113	0.00832019	Id1/Sptbn1/Apc/Ppp1r15a/Id3	5	Exclusive gene
Angiogenesis	Angiogenesis	Angiogenesis	44613	34/1665	0.0667238	0.533791	0.526767	Stc1/App	2	Exclusive gene
Collagen_formation1	Collagen_formation	Collagen_formation	44613	67/1665	0.205791	0.728196	0.718614	Plec/Col4a4	2	Exclusive gene
Apoptosis1	Apoptosis	Apoptosis	44613	70/1665	0.219886	0.728196	0.718614	Atf3/App	2	Exclusive gene
Biosynthesis.of.unsaturated.fatty.acids1	Biosynthesis.of.unsaturated.fatty.acids	Biosynthesis.of.unsaturated.fatty.acids	44582	26/1665	0.282895	0.728196	0.718614	Elovl6	1	Exclusive gene
Cysteine.and.methionine.metabolism1	Cysteine.and.methionine.metabolism	Cysteine.and.methionine.metabolism	44582	37/1665	0.378003	0.728196	0.718614	Ldha	1	Exclusive gene
Glutathione.metabolism1	Glutathione.metabolism	Glutathione.metabolism	44582	48/1665	0.461021	0.728196	0.718614	Odc1	1	Exclusive gene
Oxidative.phosphorylation1	Oxidative.phosphorylation	Oxidative.phosphorylation	44613	129/1665	0.493005	0.728196	0.718614	Atp6v1f/Atp4a	2	Exclusive gene
Arginine.and.proline.metabolism1	Arginine.and.proline.metabolism	Arginine.and.proline.metabolism	44582	53/1665	0.495164	0.728196	0.718614	Odc1	1	Exclusive gene
Arachidonic.acid.metabolism1	Arachidonic.acid.metabolism	Arachidonic.acid.metabolism	44582	57/1665	0.520984	0.728196	0.718614	Ptges	1	Exclusive gene
Autophagy1	Autophagy	Autophagy	44582	61/1665	0.545544	0.728196	0.718614	Ctsd	1	Exclusive gene
Glycolysis...Gluconeogenesis1	Glycolysis...Gluconeogenesis	Glycolysis...Gluconeogenesis	44582	63/1665	0.557369	0.728196	0.718614	Ldha	1	Exclusive gene
NFKB1	NFKB1	NFKB1	44582	77/1665	0.632309	0.728196	0.718614	Blnk	1	Exclusive gene
Glycerophospholipid.metabolism	Glycerophospholipid.metabolism	Glycerophospholipid.metabolism	44582	78/1665	0.637171	0.728196	0.718614	Pcyt2	1	Exclusive gene
Inflammation1	Inflammation	Inflammation	44582	98/1665	0.72248	0.770645	0.760505	Hbegf	1	Exclusive gene
Purine.metabolism1	Purine.metabolism	Purine.metabolism	44582	161/1665	0.883429	0.883429	0.871805	Pde3b	1	Exclusive gene

## Sheet: EnC
	ID	Description	GeneRatio	BgRatio	pvalue	p.adjust	qvalue	geneID	Count	source
ROS.GSEA.	ROS.GSEA.	ROS.GSEA.	44603	47/1665	0.0364784	0.246527	0.219579	Gpx3/Ftl1	2	Intersective gene
Glutathione.metabolism	Glutathione.metabolism	Glutathione.metabolism	44603	48/1665	0.0379272	0.246527	0.219579	Gstm5/Gpx3	2	Intersective gene
Glycolysis...Gluconeogenesis	Glycolysis...Gluconeogenesis	Glycolysis...Gluconeogenesis	44603	63/1665	0.0622058	0.269558	0.240092	Aldob/Hk1	2	Intersective gene
Phenylalanine.metabolism	Phenylalanine.metabolism	Phenylalanine.metabolism	44572	19/1665	0.118941	0.294075	0.261929	Mif	1	Intersective gene
Alanine..aspartate.and.glutamate.metabolism	Alanine..aspartate.and.glutamate.metabolism	Alanine..aspartate.and.glutamate.metabolism	44572	29/1665	0.176233	0.294075	0.261929	Acy3	1	Intersective gene
Citrate.cycle..TCA.cycle.	Citrate.cycle..TCA.cycle.	Citrate.cycle..TCA.cycle.	44572	30/1665	0.181772	0.294075	0.261929	Mdh1	1	Intersective gene
Histidine.metabolism	Histidine.metabolism	Histidine.metabolism	44572	32/1665	0.192748	0.294075	0.261929	Acy3	1	Intersective gene
ROS.elimination	ROS.elimination	ROS.elimination	44572	32/1665	0.192748	0.294075	0.261929	Gstm5	1	Intersective gene
Angiogenesis	Angiogenesis	Angiogenesis	44572	34/1665	0.20359	0.294075	0.261929	Spp1	1	Intersective gene
Tyrosine.metabolism	Tyrosine.metabolism	Tyrosine.metabolism	44572	40/1665	0.235327	0.305925	0.272484	Mif	1	Intersective gene
Arachidonic.acid.metabolism	Arachidonic.acid.metabolism	Arachidonic.acid.metabolism	44572	57/1665	0.319107	0.377126	0.335902	Gpx3	1	Intersective gene
Oxidative.phosphorylation	Oxidative.phosphorylation	Oxidative.phosphorylation	44572	129/1665	0.589289	0.638396	0.568612	Atp6v1f	1	Intersective gene
Purine.metabolism	Purine.metabolism	Purine.metabolism	44572	161/1665	0.674443	0.674443	0.600718	Polr2l	1	Intersective gene
Glycerolipid.metabolism	Glycerolipid.metabolism	Glycerolipid.metabolism	5/50	47/1665	0.0117929	0.186613	0.182888	Gk/Dgkd/Tkfc/Agpat3/Agpat2	5	Exclusive gene
Glutathione.metabolism1	Glutathione.metabolism	Glutathione.metabolism	5/50	48/1665	0.0128699	0.186613	0.182888	Ggt1/Idh1/Gss/Oplah/Gsta3	5	Exclusive gene
Glycerophospholipid.metabolism	Glycerophospholipid.metabolism	Glycerophospholipid.metabolism	5/50	78/1665	0.0808704	0.587636	0.575905	Lpgat1/Dgkd/Gpd1/Agpat3/Agpat2	5	Exclusive gene
Glycolysis...Gluconeogenesis1	Glycolysis...Gluconeogenesis	Glycolysis...Gluconeogenesis	4/50	63/1665	0.117239	0.587636	0.575905	Pgam1/Fbp1/Aldoa/Pck1	4	Exclusive gene
Nitrogen.metabolism	Nitrogen.metabolism	Nitrogen.metabolism	2/50	20/1665	0.119172	0.587636	0.575905	Car4/Car14	2	Exclusive gene
Hypoxia	Hypoxia	Hypoxia	4/50	73/1665	0.172889	0.587636	0.575905	Vegfa/Egln2/Psma4/Psmd11	4	Exclusive gene
Citrate.cycle..TCA.cycle.1	Citrate.cycle..TCA.cycle.	Citrate.cycle..TCA.cycle.	2/50	30/1665	0.226811	0.587636	0.575905	Pck1/Idh1	2	Exclusive gene
Glycine..serine.and.threonine.metabolism	Glycine..serine.and.threonine.metabolism	Glycine..serine.and.threonine.metabolism	2/50	31/1665	0.238074	0.587636	0.575905	Shmt1/Pipox	2	Exclusive gene
Arachidonic.acid.metabolism1	Arachidonic.acid.metabolism	Arachidonic.acid.metabolism	3/50	57/1665	0.24315	0.587636	0.575905	Ggt1/Cyp4a10/Cyp4a31	3	Exclusive gene
TGF-β	TGF-β	TGF-β	3/50	57/1665	0.24315	0.587636	0.575905	Lefty1/Tgfb1/Hdac1	3	Exclusive gene
Histidine.metabolism1	Histidine.metabolism	Histidine.metabolism	2/50	32/1665	0.24937	0.587636	0.575905	Aspa/Lcmt1	2	Exclusive gene
ROS.elimination1	ROS.elimination	ROS.elimination	2/50	32/1665	0.24937	0.587636	0.575905	Gsta2/Gsta3	2	Exclusive gene
Taurine.and.hypotaurine.metabolism	Taurine.and.hypotaurine.metabolism	Taurine.and.hypotaurine.metabolism	1/50	10/1665	0.263423	0.587636	0.575905	Ggt1	1	Exclusive gene
Collagen_formation	Collagen_formation	Collagen_formation	3/50	67/1665	0.326465	0.654114	0.641055	Col4a4/Col27a1/Plod2	3	Exclusive gene
AGE.RAGE	AGE.RAGE	AGE.RAGE	3/50	71/1665	0.360143	0.654114	0.641055	Vegfa/Tgfb1/Diaph1	3	Exclusive gene
Lysine.degradation	Lysine.degradation	Lysine.degradation	2/50	42/1665	0.361869	0.654114	0.641055	Pipox/Plod2	2	Exclusive gene
N.Glycan.biosynthesis	N.Glycan.biosynthesis	N.Glycan.biosynthesis	2/50	45/1665	0.394685	0.654114	0.641055	Alg2/Stt3b	2	Exclusive gene
Steroid.biosynthesis	Steroid.biosynthesis	Steroid.biosynthesis	1/50	17/1665	0.406002	0.654114	0.641055	Lipa	1	Exclusive gene
Phenylalanine.metabolism1	Phenylalanine.metabolism	Phenylalanine.metabolism	1/50	19/1665	0.441509	0.673882	0.660429	Pah	1	Exclusive gene
Purine.metabolism1	Purine.metabolism	Purine.metabolism	5/50	161/1665	0.539923	0.759737	0.74457	Gmpr/Entpd5/Polr1e/Papss2/Pole4	5	Exclusive gene
Biosynthesis.of.unsaturated.fatty.acids	Biosynthesis.of.unsaturated.fatty.acids	Biosynthesis.of.unsaturated.fatty.acids	1/50	26/1665	0.550154	0.759737	0.74457	Acot1	1	Exclusive gene
Alanine..aspartate.and.glutamate.metabolism1	Alanine..aspartate.and.glutamate.metabolism	Alanine..aspartate.and.glutamate.metabolism	1/50	29/1665	0.590104	0.777865	0.762336	Aspa	1	Exclusive gene
Angiogenesis1	Angiogenesis	Angiogenesis	1/50	34/1665	0.649096	0.818425	0.802086	Vegfa	1	Exclusive gene
Tyrosine.metabolism1	Tyrosine.metabolism	Tyrosine.metabolism	1/50	40/1665	0.708975	0.856679	0.839576	Lcmt1	1	Exclusive gene
ROS.GSEA.1	ROS.GSEA.	ROS.GSEA.	1/50	47/1665	0.766256	0.888856	0.871112	Egln2	1	Exclusive gene
Arginine.and.proline.metabolism	Arginine.and.proline.metabolism	Arginine.and.proline.metabolism	1/50	53/1665	0.806439	0.89949	0.881532	Pycrl	1	Exclusive gene
JAK.STAT	JAK.STAT	JAK.STAT	1/50	79/1665	0.915238	0.983034	0.963409	Il3ra	1	Exclusive gene
Inflammation	Inflammation	Inflammation	1/50	98/1665	0.954045	0.983349	0.963717	Hpn	1	Exclusive gene
Oxidative.phosphorylation1	Oxidative.phosphorylation	Oxidative.phosphorylation	1/50	129/1665	0.983349	0.983349	0.963717	Atp6v0a4	1	Exclusive gene

## Sheet: B Cell
	ID	Description	GeneRatio	BgRatio	pvalue	p.adjust	qvalue	geneID	Count	source
ROS.GSEA.	ROS.GSEA.	ROS.GSEA.	44675	47/1665	0.00391517	0.0743882	0.0700609	Gpx3/Junb/Atox1/Ftl1	4	Intersective gene
TGF-β	TGF-β	TGF-β	44644	57/1665	0.0462457	0.439334	0.413777	Junb/Ppp1r15a/Tgif1	3	Intersective gene
Angiogenesis	Angiogenesis	Angiogenesis	44616	34/1665	0.0844443	0.455263	0.428779	Spp1/App	2	Intersective gene
NFKB1	NFKB1	NFKB1	44644	77/1665	0.0958448	0.455263	0.428779	Lyn/Syk/Nfkbia	3	Intersective gene
Inflammation	Inflammation	Inflammation	44644	98/1665	0.163906	0.462002	0.435126	Ccr7/Cd55/Btg2	3	Intersective gene
Arachidonic.acid.metabolism	Arachidonic.acid.metabolism	Arachidonic.acid.metabolism	44616	57/1665	0.197249	0.462002	0.435126	Gpx3/Cyp2e1	2	Intersective gene
EMT	EMT	EMT	44585	16/1665	0.208139	0.462002	0.435126	Vim	1	Intersective gene
Glycolysis...Gluconeogenesis	Glycolysis...Gluconeogenesis	Glycolysis...Gluconeogenesis	44616	63/1665	0.229422	0.462002	0.435126	Aldob/Pck1	2	Intersective gene
Phenylalanine.metabolism	Phenylalanine.metabolism	Phenylalanine.metabolism	44585	19/1665	0.242234	0.462002	0.435126	Mif	1	Intersective gene
Nitrogen.metabolism	Nitrogen.metabolism	Nitrogen.metabolism	44585	20/1665	0.253283	0.462002	0.435126	Car2	1	Intersective gene
Apoptosis	Apoptosis	Apoptosis	44616	70/1665	0.267475	0.462002	0.435126	App/Btg2	2	Intersective gene
Citrate.cycle..TCA.cycle.	Citrate.cycle..TCA.cycle.	Citrate.cycle..TCA.cycle.	44585	30/1665	0.355607	0.563044	0.530291	Pck1	1	Intersective gene
Linoleic.acid.metabolism	Linoleic.acid.metabolism	Linoleic.acid.metabolism	44585	34/1665	0.392651	0.573875	0.540491	Cyp2e1	1	Intersective gene
Tyrosine.metabolism	Tyrosine.metabolism	Tyrosine.metabolism	44585	40/1665	0.444416	0.601936	0.56692	Mif	1	Intersective gene
N.Glycan.biosynthesis	N.Glycan.biosynthesis	N.Glycan.biosynthesis	44585	45/1665	0.484297	0.601936	0.56692	Man1a	1	Intersective gene
Glutathione.metabolism	Glutathione.metabolism	Glutathione.metabolism	44585	48/1665	0.506893	0.601936	0.56692	Gpx3	1	Intersective gene
AGE.RAGE	AGE.RAGE	AGE.RAGE	44585	71/1665	0.651229	0.698415	0.657787	Kras	1	Intersective gene
PI3K_AKT_mTOR	PI3K_AKT_mTOR	PI3K_AKT_mTOR	44585	73/1665	0.661656	0.698415	0.657787	Grb2	1	Intersective gene
Oxidative.phosphorylation	Oxidative.phosphorylation	Oxidative.phosphorylation	44585	129/1665	0.857655	0.857655	0.807764	Ppa1	1	Intersective gene
Glutathione.metabolism1	Glutathione.metabolism	Glutathione.metabolism	7/64	48/1665	0.00188164	0.0658576	0.0594204	Idh1/Odc1/Gstm5/Gstt2/Gsta3/Ggt1/Anpep	7	Exclusive gene
Alanine..aspartate.and.glutamate.metabolism	Alanine..aspartate.and.glutamate.metabolism	Alanine..aspartate.and.glutamate.metabolism	4/64	29/1665	0.0228903	0.338667	0.305565	Aspa/Ass1/Asl/Glul	4	Exclusive gene
ROS.elimination	ROS.elimination	ROS.elimination	4/64	32/1665	0.0318032	0.338667	0.305565	Gsta2/Gstm5/Gsta3/Prdx1	4	Exclusive gene
Nitrogen.metabolism1	Nitrogen.metabolism	Nitrogen.metabolism	3/64	20/1665	0.0387049	0.338667	0.305565	Car12/Car14/Glul	3	Exclusive gene
Arginine.and.proline.metabolism	Arginine.and.proline.metabolism	Arginine.and.proline.metabolism	5/64	53/1665	0.0495629	0.34694	0.313029	Odc1/Ass1/Dao/Asl/Glul	5	Exclusive gene
Glycerolipid.metabolism	Glycerolipid.metabolism	Glycerolipid.metabolism	4/64	47/1665	0.103107	0.601456	0.542667	Tkfc/Gk/Agpat3/Akr1a1	4	Exclusive gene
AGE.RAGE1	AGE.RAGE	AGE.RAGE	5/64	71/1665	0.133299	0.666496	0.60135	Ccnd1/Nox4/Prkcb/Vegfb/Tgfb1	5	Exclusive gene
Citrate.cycle..TCA.cycle.1	Citrate.cycle..TCA.cycle.	Citrate.cycle..TCA.cycle.	2/64	30/1665	0.321822	0.946449	0.853939	Idh1/Mdh1	2	Exclusive gene
Taurine.and.hypotaurine.metabolism	Taurine.and.hypotaurine.metabolism	Taurine.and.hypotaurine.metabolism	1/64	10/1665	0.325006	0.946449	0.853939	Ggt1	1	Exclusive gene
Glycine..serine.and.threonine.metabolism	Glycine..serine.and.threonine.metabolism	Glycine..serine.and.threonine.metabolism	2/64	31/1665	0.33619	0.946449	0.853939	Pipox/Dao	2	Exclusive gene
Angiogenesis1	Angiogenesis	Angiogenesis	2/64	34/1665	0.37873	0.946449	0.853939	Lrpap1/Tnfrsf21	2	Exclusive gene
Autophagy	Autophagy	Autophagy	3/64	61/1665	0.419086	0.946449	0.853939	Igf2r/Ctsl/Rab1a	3	Exclusive gene
Steroid.biosynthesis	Steroid.biosynthesis	Steroid.biosynthesis	1/64	17/1665	0.488103	0.946449	0.853939	Dhcr24	1	Exclusive gene
N.Glycan.biosynthesis1	N.Glycan.biosynthesis	N.Glycan.biosynthesis	2/64	45/1665	0.523288	0.946449	0.853939	Rpn1/Ddost	2	Exclusive gene
Phenylalanine.metabolism1	Phenylalanine.metabolism	Phenylalanine.metabolism	1/64	19/1665	0.527101	0.946449	0.853939	Pah	1	Exclusive gene
PI3K_AKT_mTOR1	PI3K_AKT_mTOR	PI3K_AKT_mTOR	3/64	73/1665	0.539924	0.946449	0.853939	Pfn1/Prkaa2/Hsp90b1	3	Exclusive gene
ROS.GSEA.1	ROS.GSEA.	ROS.GSEA.	2/64	47/1665	0.547151	0.946449	0.853939	Txn1/Prdx1	2	Exclusive gene
NFKB11	NFKB1	NFKB1	3/64	77/1665	0.577068	0.946449	0.853939	Chuk/Prkcb/Ltb	3	Exclusive gene
beta.Alanine.metabolism	beta.Alanine.metabolism	beta.Alanine.metabolism	1/64	22/1665	0.580177	0.946449	0.853939	Upb1	1	Exclusive gene
Glycerophospholipid.metabolism	Glycerophospholipid.metabolism	Glycerophospholipid.metabolism	3/64	78/1665	0.586068	0.946449	0.853939	Agpat3/Gpd1/Pcyt2	3	Exclusive gene
Biosynthesis.of.unsaturated.fatty.acids	Biosynthesis.of.unsaturated.fatty.acids	Biosynthesis.of.unsaturated.fatty.acids	1/64	26/1665	0.64192	0.946449	0.853939	Pecr	1	Exclusive gene
Arachidonic.acid.metabolism1	Arachidonic.acid.metabolism	Arachidonic.acid.metabolism	2/64	57/1665	0.653942	0.946449	0.853939	Cyp4a10/Ggt1	2	Exclusive gene
TGF-β1	TGF-β	TGF-β	2/64	57/1665	0.653942	0.946449	0.853939	Id2/Tgfb1	2	Exclusive gene
Glycolysis...Gluconeogenesis1	Glycolysis...Gluconeogenesis	Glycolysis...Gluconeogenesis	2/64	63/1665	0.70802	0.946449	0.853939	Fbp1/Akr1a1	2	Exclusive gene
Histidine.metabolism	Histidine.metabolism	Histidine.metabolism	1/64	32/1665	0.718144	0.946449	0.853939	Aspa	1	Exclusive gene
Inflammation1	Inflammation	Inflammation	3/64	98/1665	0.74008	0.946449	0.853939	Atp2a2/Hpn/Nkg7	3	Exclusive gene
Collagen_formation	Collagen_formation	Collagen_formation	2/64	67/1665	0.740102	0.946449	0.853939	Dst/Col27a1	2	Exclusive gene
Apoptosis1	Apoptosis	Apoptosis	2/64	70/1665	0.762186	0.946449	0.853939	Ccnd1/Dnajc3	2	Exclusive gene
Tyrosine.metabolism1	Tyrosine.metabolism	Tyrosine.metabolism	1/64	40/1665	0.795442	0.946449	0.853939	Hgd	1	Exclusive gene
Lysine.degradation	Lysine.degradation	Lysine.degradation	1/64	42/1665	0.811242	0.946449	0.853939	Pipox	1	Exclusive gene
Valine..leucine.and.isoleucine.degradation	Valine..leucine.and.isoleucine.degradation	Valine..leucine.and.isoleucine.degradation	1/64	47/1665	0.845676	0.954796	0.86147	Hmgcs1	1	Exclusive gene
Oxidative.phosphorylation1	Oxidative.phosphorylation	Oxidative.phosphorylation	3/64	129/1665	0.886675	0.969801	0.875008	Atp6v1a/Atp6v1e1/Atp6v1g1	3	Exclusive gene
Hypoxia	Hypoxia	Hypoxia	1/64	73/1665	0.94641	0.986301	0.889896	Psmb2	1	Exclusive gene
JAK.STAT	JAK.STAT	JAK.STAT	1/64	79/1665	0.958121	0.986301	0.889896	Ghr	1	Exclusive gene
Purine.metabolism	Purine.metabolism	Purine.metabolism	2/64	161/1665	0.989366	0.989366	0.892661	Adk/Nme1	2	Exclusive gene

## Sheet: Mac
	ID	Description	GeneRatio	BgRatio	pvalue	p.adjust	qvalue	geneID	Count	source
Apoptosis	Apoptosis	Apoptosis	44677	70/1665	0.0212609	0.347803	0.329498	Ccnd1/Crebbp/Bcl10/Cyld	4	Intersective gene
ROS.GSEA.	ROS.GSEA.	ROS.GSEA.	44646	47/1665	0.0347803	0.347803	0.329498	Gpx3/Lsp1/Ftl1	3	Intersective gene
Glycolysis...Gluconeogenesis	Glycolysis...Gluconeogenesis	Glycolysis...Gluconeogenesis	44646	63/1665	0.0722668	0.481778	0.456422	Aldob/Fbp1/Akr1a1	3	Intersective gene
NFKB1	NFKB1	NFKB1	44646	77/1665	0.115388	0.48891	0.463178	Csnk2b/Bcl10/Tnfrsf1a	3	Intersective gene
JAK.STAT	JAK.STAT	JAK.STAT	44646	79/1665	0.122228	0.48891	0.463178	Ghr/Il7r/Il6ra	3	Intersective gene
Phenylalanine.metabolism	Phenylalanine.metabolism	Phenylalanine.metabolism	44587	19/1665	0.259685	0.704323	0.667253	Pah	1	Intersective gene
AGE.RAGE	AGE.RAGE	AGE.RAGE	44618	71/1665	0.305171	0.704323	0.667253	Ccnd1/Prkcz	2	Intersective gene
Hypoxia	Hypoxia	Hypoxia	44618	73/1665	0.316945	0.704323	0.667253	Psma4/Crebbp	2	Intersective gene
PI3K_AKT_mTOR	PI3K_AKT_mTOR	PI3K_AKT_mTOR	44618	73/1665	0.316945	0.704323	0.667253	Csnk2b/Arpc3	2	Intersective gene
Alanine..aspartate.and.glutamate.metabolism	Alanine..aspartate.and.glutamate.metabolism	Alanine..aspartate.and.glutamate.metabolism	44587	29/1665	0.36893	0.734018	0.695386	Ass1	1	Intersective gene
Tryptophan.metabolism	Tryptophan.metabolism	Tryptophan.metabolism	44587	41/1665	0.47964	0.734018	0.695386	Inmt	1	Intersective gene
Glycerolipid.metabolism	Glycerolipid.metabolism	Glycerolipid.metabolism	44587	47/1665	0.527738	0.734018	0.695386	Akr1a1	1	Intersective gene
Glutathione.metabolism	Glutathione.metabolism	Glutathione.metabolism	44587	48/1665	0.535327	0.734018	0.695386	Gpx3	1	Intersective gene
Arginine.and.proline.metabolism	Arginine.and.proline.metabolism	Arginine.and.proline.metabolism	44587	53/1665	0.571546	0.734018	0.695386	Ass1	1	Intersective gene
Arachidonic.acid.metabolism	Arachidonic.acid.metabolism	Arachidonic.acid.metabolism	44587	57/1665	0.598551	0.734018	0.695386	Gpx3	1	Intersective gene
TGF-β	TGF-β	TGF-β	44587	57/1665	0.598551	0.734018	0.695386	Thbs1	1	Intersective gene
Autophagy	Autophagy	Autophagy	44587	61/1665	0.623915	0.734018	0.695386	Sqstm1	1	Intersective gene
Glycerophospholipid.metabolism	Glycerophospholipid.metabolism	Glycerophospholipid.metabolism	44587	78/1665	0.715541	0.795046	0.753201	Gpd1	1	Intersective gene
Oxidative.phosphorylation	Oxidative.phosphorylation	Oxidative.phosphorylation	44587	129/1665	0.879162	0.925433	0.876726	Atp6v1e1	1	Intersective gene
Purine.metabolism	Purine.metabolism	Purine.metabolism	44587	161/1665	0.930417	0.930417	0.881448	Pnp	1	Intersective gene
Glycine..serine.and.threonine.metabolism	Glycine..serine.and.threonine.metabolism	Glycine..serine.and.threonine.metabolism	4/75	31/1665	0.0474937	0.596915	0.596915	Dao/Cth/Phgdh/Pipox	4	Exclusive gene
ROS.elimination	ROS.elimination	ROS.elimination	4/75	32/1665	0.0524813	0.596915	0.596915	Gsta2/Gsta3/Gstm5/Prdx1	4	Exclusive gene
Nitrogen.metabolism	Nitrogen.metabolism	Nitrogen.metabolism	3/75	20/1665	0.0576641	0.596915	0.596915	Cth/Car14/Car2	3	Exclusive gene
Glutathione.metabolism1	Glutathione.metabolism	Glutathione.metabolism	5/75	48/1665	0.0612221	0.596915	0.596915	Gsta3/Gstm5/Txndc12/Odc1/Oplah	5	Exclusive gene
Tyrosine.metabolism	Tyrosine.metabolism	Tyrosine.metabolism	4/75	40/1665	0.102069	0.706592	0.706592	Adh1/Hgd/Mif/Fah	4	Exclusive gene
Biosynthesis.of.unsaturated.fatty.acids	Biosynthesis.of.unsaturated.fatty.acids	Biosynthesis.of.unsaturated.fatty.acids	3/75	26/1665	0.108706	0.706592	0.706592	Pecr/Acox1/Acox3	3	Exclusive gene
Alanine..aspartate.and.glutamate.metabolism1	Alanine..aspartate.and.glutamate.metabolism	Alanine..aspartate.and.glutamate.metabolism	3/75	29/1665	0.139036	0.729938	0.729938	Acy3/Aspa/Asl	3	Exclusive gene
Citrate.cycle..TCA.cycle.	Citrate.cycle..TCA.cycle.	Citrate.cycle..TCA.cycle.	3/75	30/1665	0.149731	0.729938	0.729938	Aco1/Pck1/Mdh1	3	Exclusive gene
Angiogenesis	Angiogenesis	Angiogenesis	3/75	34/1665	0.194905	0.743501	0.743501	Ccnd2/Lrpap1/Spp1	3	Exclusive gene
Apoptosis1	Apoptosis	Apoptosis	5/75	70/1665	0.204118	0.743501	0.743501	Cth/Ccnd2/Btg3/Bmf/Casp6	5	Exclusive gene
alpha.Linolenic.acid.metabolism	alpha.Linolenic.acid.metabolism	alpha.Linolenic.acid.metabolism	2/75	19/1665	0.209705	0.743501	0.743501	Acox1/Acox3	2	Exclusive gene
N.Glycan.biosynthesis	N.Glycan.biosynthesis	N.Glycan.biosynthesis	3/75	45/1665	0.330677	0.984428	0.984428	Rpn1/Stt3b/Stt3a	3	Exclusive gene
Valine..leucine.and.isoleucine.biosynthesis	Valine..leucine.and.isoleucine.biosynthesis	Valine..leucine.and.isoleucine.biosynthesis	1/75	11/1665	0.398643	0.984428	0.984428	Iars	1	Exclusive gene
Histidine.metabolism	Histidine.metabolism	Histidine.metabolism	2/75	32/1665	0.427192	0.984428	0.984428	Acy3/Aspa	2	Exclusive gene
Arginine.and.proline.metabolism1	Arginine.and.proline.metabolism	Arginine.and.proline.metabolism	3/75	53/1665	0.430795	0.984428	0.984428	Dao/Odc1/Asl	3	Exclusive gene
Purine.metabolism1	Purine.metabolism	Purine.metabolism	8/75	161/1665	0.441189	0.984428	0.984428	Impdh1/Papss2/Nme1/Adk/Papss1/Nme5/Polr2f/Entpd5	8	Exclusive gene
Cysteine.and.methionine.metabolism	Cysteine.and.methionine.metabolism	Cysteine.and.methionine.metabolism	2/75	37/1665	0.503425	0.984428	0.984428	Cth/Apip	2	Exclusive gene
EMT	EMT	EMT	1/75	16/1665	0.523305	0.984428	0.984428	Itgb6	1	Exclusive gene
Steroid.biosynthesis	Steroid.biosynthesis	Steroid.biosynthesis	1/75	17/1665	0.544986	0.984428	0.984428	Lipa	1	Exclusive gene
Glycolysis...Gluconeogenesis1	Glycolysis...Gluconeogenesis	Glycolysis...Gluconeogenesis	3/75	63/1665	0.547771	0.984428	0.984428	Adh1/Pck1/Galm	3	Exclusive gene
Phenylalanine.metabolism1	Phenylalanine.metabolism	Phenylalanine.metabolism	1/75	19/1665	0.585471	0.984428	0.984428	Mif	1	Exclusive gene
Collagen_formation	Collagen_formation	Collagen_formation	3/75	67/1665	0.590625	0.984428	0.984428	Col27a1/Col4a3/Col8a1	3	Exclusive gene
Glycerolipid.metabolism1	Glycerolipid.metabolism	Glycerolipid.metabolism	2/75	47/1665	0.63532	0.984428	0.984428	Tkfc/Gk	2	Exclusive gene
ROS.GSEA.1	ROS.GSEA.	ROS.GSEA.	2/75	47/1665	0.63532	0.984428	0.984428	Prdx1/Hmox2	2	Exclusive gene
Hypoxia1	Hypoxia	Hypoxia	3/75	73/1665	0.649952	0.984428	0.984428	Psmd9/Psmc5/Cited2	3	Exclusive gene
Linoleic.acid.metabolism	Linoleic.acid.metabolism	Linoleic.acid.metabolism	1/75	34/1665	0.794686	0.984428	0.984428	Cyp2e1	1	Exclusive gene
Inflammation	Inflammation	Inflammation	3/75	98/1665	0.831509	0.984428	0.984428	Atp2a2/Hpn/Nkg7	3	Exclusive gene
PI3K_AKT_mTOR1	PI3K_AKT_mTOR	PI3K_AKT_mTOR	2/75	73/1665	0.852492	0.984428	0.984428	Gsk3b/Hsp90b1	2	Exclusive gene
Lysine.degradation	Lysine.degradation	Lysine.degradation	1/75	42/1665	0.859232	0.984428	0.984428	Pipox	1	Exclusive gene
NFKB11	NFKB1	NFKB1	2/75	77/1665	0.872927	0.984428	0.984428	Plau/Cd40lg	2	Exclusive gene
Glycerophospholipid.metabolism1	Glycerophospholipid.metabolism	Glycerophospholipid.metabolism	2/75	78/1665	0.877618	0.984428	0.984428	Lypla2/Gnpat	2	Exclusive gene
Valine..leucine.and.isoleucine.degradation	Valine..leucine.and.isoleucine.degradation	Valine..leucine.and.isoleucine.degradation	1/75	47/1665	0.88892	0.984428	0.984428	Hmgcs1	1	Exclusive gene
Steroid.hormone.biosynthesis	Steroid.hormone.biosynthesis	Steroid.hormone.biosynthesis	1/75	52/1665	0.912412	0.984428	0.984428	Hsd3b2	1	Exclusive gene
Arachidonic.acid.metabolism1	Arachidonic.acid.metabolism	Arachidonic.acid.metabolism	1/75	57/1665	0.930989	0.984428	0.984428	Cyp2e1	1	Exclusive gene
TGF-β1	TGF-β	TGF-β	1/75	57/1665	0.930989	0.984428	0.984428	Wwtr1	1	Exclusive gene
Autophagy1	Autophagy	Autophagy	1/75	61/1665	0.943001	0.984428	0.984428	Igf2r	1	Exclusive gene
AGE.RAGE1	AGE.RAGE	AGE.RAGE	1/75	71/1665	0.964739	0.984428	0.984428	Nox4	1	Exclusive gene
JAK.STAT1	JAK.STAT	JAK.STAT	1/75	79/1665	0.976041	0.984428	0.984428	Il15ra	1	Exclusive gene
Oxidative.phosphorylation1	Oxidative.phosphorylation	Oxidative.phosphorylation	2/75	129/1665	0.984428	0.984428	0.984428	Atp6v1a/Atp6v1d	2	Exclusive gene
