# Supplementary material for: Single-Cell Transcriptional Landscape Reveals the Regulatory Network and Its Heterogeneity of Renal Mitochondrial Damages in Diabetic Kidney Disease
Source: Int J Mol Sci. 2023 Aug 31;24(17):13502. doi: 10.3390/ijms241713502 (PMC10487965; doi:10.3390/ijms241713502)
Supplement: Supplementary file 1 [file ijms-24-13502-s001.zip › Table S5.xlsx]

## Sheet: source as DLH_HDC
source	target	ligand	receptor	prob	pval	interaction_name	interaction_name_2	pathway_name	annotation	evidence
DLH_HDC	S3	Wnt7b	FZD1_LRP6	0.000973891	0	WNT7B_FZD1_LRP6	Wnt7b - (Fzd1+Lrp6)	WNT	Secreted Signaling	KEGG: mmu04310; PMID: 23209147
DLH_HDC	S1	Col4a3	ITGA1_ITGB1	0.00830184	0	COL4A3_ITGA1_ITGB1	Col4a3 - (Itga1+Itgb1)	COLLAGEN	ECM-Receptor	KEGG: mmu04512
DLH_HDC	S3	Col4a3	ITGA1_ITGB1	0.00837048	0	COL4A3_ITGA1_ITGB1	Col4a3 - (Itga1+Itgb1)	COLLAGEN	ECM-Receptor	KEGG: mmu04512
DLH_HDC	DLH_DDC	Col4a3	ITGA1_ITGB1	0.0229903	0	COL4A3_ITGA1_ITGB1	Col4a3 - (Itga1+Itgb1)	COLLAGEN	ECM-Receptor	KEGG: mmu04512
DLH_HDC	CD-PC_HDC	Col4a3	ITGA1_ITGB1	0.00706768	0	COL4A3_ITGA1_ITGB1	Col4a3 - (Itga1+Itgb1)	COLLAGEN	ECM-Receptor	KEGG: mmu04512
DLH_HDC	CD-PC_DDC	Col4a3	ITGA1_ITGB1	0.0111364	0	COL4A3_ITGA1_ITGB1	Col4a3 - (Itga1+Itgb1)	COLLAGEN	ECM-Receptor	KEGG: mmu04512
DLH_HDC	CD-IC	Col4a3	ITGA1_ITGB1	0.00749818	0	COL4A3_ITGA1_ITGB1	Col4a3 - (Itga1+Itgb1)	COLLAGEN	ECM-Receptor	KEGG: mmu04512
DLH_HDC	EnC_HDC	Col4a3	ITGA1_ITGB1	0.0179711	0	COL4A3_ITGA1_ITGB1	Col4a3 - (Itga1+Itgb1)	COLLAGEN	ECM-Receptor	KEGG: mmu04512
DLH_HDC	EnC_DDC	Col4a3	ITGA1_ITGB1	0.0123171	0	COL4A3_ITGA1_ITGB1	Col4a3 - (Itga1+Itgb1)	COLLAGEN	ECM-Receptor	KEGG: mmu04512
DLH_HDC	Mac_HDC	Col4a3	ITGA1_ITGB1	0.00378375	0.02	COL4A3_ITGA1_ITGB1	Col4a3 - (Itga1+Itgb1)	COLLAGEN	ECM-Receptor	KEGG: mmu04512
DLH_HDC	DC	Col4a3	ITGA1_ITGB1	0.00120027	0	COL4A3_ITGA1_ITGB1	Col4a3 - (Itga1+Itgb1)	COLLAGEN	ECM-Receptor	KEGG: mmu04512
DLH_HDC	S1	Col4a4	ITGAV_ITGB8	0.0196322	0	COL4A4_ITGAV_ITGB8	Col4a4 - (Itgav+Itgb8)	COLLAGEN	ECM-Receptor	KEGG: mmu04512
DLH_HDC	S3	Col4a4	ITGAV_ITGB8	0.0474953	0	COL4A4_ITGAV_ITGB8	Col4a4 - (Itgav+Itgb8)	COLLAGEN	ECM-Receptor	KEGG: mmu04512
DLH_HDC	DLH_DDC	Col4a4	ITGAV_ITGB8	0.0380417	0	COL4A4_ITGAV_ITGB8	Col4a4 - (Itgav+Itgb8)	COLLAGEN	ECM-Receptor	KEGG: mmu04512
DLH_HDC	T Cell	Col4a4	Cd44	0.0218408	0	COL4A4_CD44	Col4a4 - Cd44	COLLAGEN	ECM-Receptor	KEGG: mmu04512
DLH_HDC	Mac_HDC	Col4a4	Cd44	0.128383	0	COL4A4_CD44	Col4a4 - Cd44	COLLAGEN	ECM-Receptor	KEGG: mmu04512
DLH_HDC	Mac_DDC	Col4a4	Cd44	0.135618	0	COL4A4_CD44	Col4a4 - Cd44	COLLAGEN	ECM-Receptor	KEGG: mmu04512
DLH_HDC	B Cell_HDC	Col4a5	Sdc1	0.000986648	0	COL4A5_SDC1	Col4a5 - Sdc1	COLLAGEN	ECM-Receptor	KEGG: mmu04512
DLH_HDC	S1	Col4a4	Sdc4	0.109137	0	COL4A4_SDC4	Col4a4 - Sdc4	COLLAGEN	ECM-Receptor	KEGG: mmu04512
DLH_HDC	S2	Col4a4	Sdc4	0.0234344	0.04	COL4A4_SDC4	Col4a4 - Sdc4	COLLAGEN	ECM-Receptor	KEGG: mmu04512
DLH_HDC	S3	Col4a4	Sdc4	0.110317	0	COL4A4_SDC4	Col4a4 - Sdc4	COLLAGEN	ECM-Receptor	KEGG: mmu04512
DLH_HDC	DLH_HDC	Col4a4	Sdc4	0.160801	0	COL4A4_SDC4	Col4a4 - Sdc4	COLLAGEN	ECM-Receptor	KEGG: mmu04512
DLH_HDC	DLH_DDC	Col4a4	Sdc4	0.111849	0	COL4A4_SDC4	Col4a4 - Sdc4	COLLAGEN	ECM-Receptor	KEGG: mmu04512
DLH_HDC	ALH	Col4a4	Sdc4	0.100986	0	COL4A4_SDC4	Col4a4 - Sdc4	COLLAGEN	ECM-Receptor	KEGG: mmu04512
DLH_HDC	DCT	Col4a4	Sdc4	0.12173	0	COL4A4_SDC4	Col4a4 - Sdc4	COLLAGEN	ECM-Receptor	KEGG: mmu04512
DLH_HDC	CD-PC_HDC	Col4a4	Sdc4	0.160157	0	COL4A4_SDC4	Col4a4 - Sdc4	COLLAGEN	ECM-Receptor	KEGG: mmu04512
DLH_HDC	CD-PC_DDC	Col4a4	Sdc4	0.15089	0	COL4A4_SDC4	Col4a4 - Sdc4	COLLAGEN	ECM-Receptor	KEGG: mmu04512
DLH_HDC	CD-IC	Col4a4	Sdc4	0.114088	0	COL4A4_SDC4	Col4a4 - Sdc4	COLLAGEN	ECM-Receptor	KEGG: mmu04512
DLH_HDC	B Cell_HDC	Col4a4	Sdc4	0.0213784	0.05	COL4A4_SDC4	Col4a4 - Sdc4	COLLAGEN	ECM-Receptor	KEGG: mmu04512
DLH_HDC	B Cell_DDC	Col4a4	Sdc4	0.032625	0	COL4A4_SDC4	Col4a4 - Sdc4	COLLAGEN	ECM-Receptor	KEGG: mmu04512
DLH_HDC	DC	Col4a4	Sdc4	0.0458122	0	COL4A4_SDC4	Col4a4 - Sdc4	COLLAGEN	ECM-Receptor	KEGG: mmu04512
DLH_HDC	S1	Agrn	Dag1	0.00200877	0	AGRN_DAG1	Agrn - Dag1	AGRN	ECM-Receptor	KEGG: mmu04512
DLH_HDC	S3	Agrn	Dag1	0.0017301	0	AGRN_DAG1	Agrn - Dag1	AGRN	ECM-Receptor	KEGG: mmu04512
DLH_HDC	DLH_HDC	Agrn	Dag1	0.0143773	0	AGRN_DAG1	Agrn - Dag1	AGRN	ECM-Receptor	KEGG: mmu04512
DLH_HDC	DLH_DDC	Agrn	Dag1	0.0065966	0	AGRN_DAG1	Agrn - Dag1	AGRN	ECM-Receptor	KEGG: mmu04512
DLH_HDC	ALH	Agrn	Dag1	0.00209998	0	AGRN_DAG1	Agrn - Dag1	AGRN	ECM-Receptor	KEGG: mmu04512
DLH_HDC	DCT	Agrn	Dag1	0.0029909	0	AGRN_DAG1	Agrn - Dag1	AGRN	ECM-Receptor	KEGG: mmu04512
DLH_HDC	CD-PC_HDC	Agrn	Dag1	0.0101105	0	AGRN_DAG1	Agrn - Dag1	AGRN	ECM-Receptor	KEGG: mmu04512
DLH_HDC	CD-PC_DDC	Agrn	Dag1	0.0091585	0	AGRN_DAG1	Agrn - Dag1	AGRN	ECM-Receptor	KEGG: mmu04512
DLH_HDC	CD-IC	Agrn	Dag1	0.00654351	0	AGRN_DAG1	Agrn - Dag1	AGRN	ECM-Receptor	KEGG: mmu04512
DLH_HDC	S1	App	Cd74	0.0132405	0	APP_CD74	App - Cd74	APP	Cell-Cell Contact	PMID: 19849849
DLH_HDC	DLH_DDC	App	Cd74	0.0237725	0	APP_CD74	App - Cd74	APP	Cell-Cell Contact	PMID: 19849849
DLH_HDC	B Cell_HDC	App	Cd74	0.243088	0	APP_CD74	App - Cd74	APP	Cell-Cell Contact	PMID: 19849849
DLH_HDC	B Cell_DDC	App	Cd74	0.306162	0	APP_CD74	App - Cd74	APP	Cell-Cell Contact	PMID: 19849849
DLH_HDC	Mac_HDC	App	Cd74	0.0427195	0	APP_CD74	App - Cd74	APP	Cell-Cell Contact	PMID: 19849849
DLH_HDC	Mac_DDC	App	Cd74	0.0243938	0	APP_CD74	App - Cd74	APP	Cell-Cell Contact	PMID: 19849849
DLH_HDC	Mac_HDC	L1cam	ITGA4_ITGB7	0.000628506	0	L1CAM_ITGA4_ITGB7	L1cam - (Itga4+Itgb7)	L1CAM	Cell-Cell Contact	PMID: 8557754
DLH_HDC	Mac_DDC	L1cam	ITGA4_ITGB7	0.00279544	0	L1CAM_ITGA4_ITGB7	L1cam - (Itga4+Itgb7)	L1CAM	Cell-Cell Contact	PMID: 8557754

## Sheet: source as DLH_DDC
source	target	ligand	receptor	prob	pval	interaction_name	interaction_name_2	pathway_name	annotation	evidence
DLH_DDC	S1	Egf	Egfr	0.000357768	0	EGF_EGFR	Egf - Egfr	EGF	Secreted Signaling	KEGG: mmu04012
DLH_DDC	S3	Egf	Egfr	0.00028154	0	EGF_EGFR	Egf - Egfr	EGF	Secreted Signaling	KEGG: mmu04012
DLH_DDC	DLH_HDC	Egf	Egfr	1.05418e-05	0	EGF_EGFR	Egf - Egfr	EGF	Secreted Signaling	KEGG: mmu04012
DLH_DDC	DLH_DDC	Egf	Egfr	0.000340824	0	EGF_EGFR	Egf - Egfr	EGF	Secreted Signaling	KEGG: mmu04012
DLH_DDC	CD-PC_HDC	Egf	Egfr	6.78187e-06	0.03	EGF_EGFR	Egf - Egfr	EGF	Secreted Signaling	KEGG: mmu04012
DLH_DDC	CD-PC_DDC	Egf	Egfr	3.63764e-06	0.04	EGF_EGFR	Egf - Egfr	EGF	Secreted Signaling	KEGG: mmu04012
DLH_DDC	Mac_HDC	Egf	Egfr	4.5381e-06	0.02	EGF_EGFR	Egf - Egfr	EGF	Secreted Signaling	KEGG: mmu04012
DLH_DDC	Mac_DDC	Egf	Egfr	9.06092e-06	0.03	EGF_EGFR	Egf - Egfr	EGF	Secreted Signaling	KEGG: mmu04012
DLH_DDC	DC	Egf	Egfr	2.93366e-06	0.04	EGF_EGFR	Egf - Egfr	EGF	Secreted Signaling	KEGG: mmu04012
DLH_DDC	S1	Fgf1	Fgfr3	0.00311383	0	FGF1_FGFR3	Fgf1 - Fgfr3	FGF	Secreted Signaling	PMC: 4393358
DLH_DDC	S3	Fgf1	Fgfr3	0.00269397	0	FGF1_FGFR3	Fgf1 - Fgfr3	FGF	Secreted Signaling	PMC: 4393358
DLH_DDC	S1	Col4a3	ITGA1_ITGB1	0.0047919	0	COL4A3_ITGA1_ITGB1	Col4a3 - (Itga1+Itgb1)	COLLAGEN	ECM-Receptor	KEGG: mmu04512
DLH_DDC	S3	Col4a3	ITGA1_ITGB1	0.00483166	0	COL4A3_ITGA1_ITGB1	Col4a3 - (Itga1+Itgb1)	COLLAGEN	ECM-Receptor	KEGG: mmu04512
DLH_DDC	DLH_DDC	Col4a3	ITGA1_ITGB1	0.0133539	0	COL4A3_ITGA1_ITGB1	Col4a3 - (Itga1+Itgb1)	COLLAGEN	ECM-Receptor	KEGG: mmu04512
DLH_DDC	CD-PC_HDC	Col4a3	ITGA1_ITGB1	0.00407739	0	COL4A3_ITGA1_ITGB1	Col4a3 - (Itga1+Itgb1)	COLLAGEN	ECM-Receptor	KEGG: mmu04512
DLH_DDC	CD-PC_DDC	Col4a3	ITGA1_ITGB1	0.0064358	0	COL4A3_ITGA1_ITGB1	Col4a3 - (Itga1+Itgb1)	COLLAGEN	ECM-Receptor	KEGG: mmu04512
DLH_DDC	CD-IC	Col4a3	ITGA1_ITGB1	0.00432654	0	COL4A3_ITGA1_ITGB1	Col4a3 - (Itga1+Itgb1)	COLLAGEN	ECM-Receptor	KEGG: mmu04512
DLH_DDC	EnC_HDC	Col4a3	ITGA1_ITGB1	0.010416	0	COL4A3_ITGA1_ITGB1	Col4a3 - (Itga1+Itgb1)	COLLAGEN	ECM-Receptor	KEGG: mmu04512
DLH_DDC	EnC_DDC	Col4a3	ITGA1_ITGB1	0.00712173	0	COL4A3_ITGA1_ITGB1	Col4a3 - (Itga1+Itgb1)	COLLAGEN	ECM-Receptor	KEGG: mmu04512
DLH_DDC	Mac_HDC	Col4a3	ITGA1_ITGB1	0.00217982	0.03	COL4A3_ITGA1_ITGB1	Col4a3 - (Itga1+Itgb1)	COLLAGEN	ECM-Receptor	KEGG: mmu04512
DLH_DDC	DC	Col4a3	ITGA1_ITGB1	0.000690714	0	COL4A3_ITGA1_ITGB1	Col4a3 - (Itga1+Itgb1)	COLLAGEN	ECM-Receptor	KEGG: mmu04512
DLH_DDC	S1	Col4a4	ITGAV_ITGB8	0.00928695	0	COL4A4_ITGAV_ITGB8	Col4a4 - (Itgav+Itgb8)	COLLAGEN	ECM-Receptor	KEGG: mmu04512
DLH_DDC	S3	Col4a4	ITGAV_ITGB8	0.0228091	0	COL4A4_ITGAV_ITGB8	Col4a4 - (Itgav+Itgb8)	COLLAGEN	ECM-Receptor	KEGG: mmu04512
DLH_DDC	DLH_DDC	Col4a4	ITGAV_ITGB8	0.0181754	0	COL4A4_ITGAV_ITGB8	Col4a4 - (Itgav+Itgb8)	COLLAGEN	ECM-Receptor	KEGG: mmu04512
DLH_DDC	T Cell	Col4a4	Cd44	0.010344	0	COL4A4_CD44	Col4a4 - Cd44	COLLAGEN	ECM-Receptor	KEGG: mmu04512
DLH_DDC	Mac_HDC	Col4a4	Cd44	0.0645015	0	COL4A4_CD44	Col4a4 - Cd44	COLLAGEN	ECM-Receptor	KEGG: mmu04512
DLH_DDC	Mac_DDC	Col4a4	Cd44	0.0684194	0	COL4A4_CD44	Col4a4 - Cd44	COLLAGEN	ECM-Receptor	KEGG: mmu04512
DLH_DDC	B Cell_HDC	Col4a5	Sdc1	0.00021056	0	COL4A5_SDC1	Col4a5 - Sdc1	COLLAGEN	ECM-Receptor	KEGG: mmu04512
DLH_DDC	S1	Col4a4	Sdc4	0.054236	0	COL4A4_SDC4	Col4a4 - Sdc4	COLLAGEN	ECM-Receptor	KEGG: mmu04512
DLH_DDC	S3	Col4a4	Sdc4	0.0548594	0	COL4A4_SDC4	Col4a4 - Sdc4	COLLAGEN	ECM-Receptor	KEGG: mmu04512
DLH_DDC	DLH_HDC	Col4a4	Sdc4	0.0823125	0	COL4A4_SDC4	Col4a4 - Sdc4	COLLAGEN	ECM-Receptor	KEGG: mmu04512
DLH_DDC	DLH_DDC	Col4a4	Sdc4	0.0556692	0	COL4A4_SDC4	Col4a4 - Sdc4	COLLAGEN	ECM-Receptor	KEGG: mmu04512
DLH_DDC	ALH	Col4a4	Sdc4	0.0499557	0	COL4A4_SDC4	Col4a4 - Sdc4	COLLAGEN	ECM-Receptor	KEGG: mmu04512
DLH_DDC	DCT	Col4a4	Sdc4	0.0609275	0	COL4A4_SDC4	Col4a4 - Sdc4	COLLAGEN	ECM-Receptor	KEGG: mmu04512
DLH_DDC	CD-PC_HDC	Col4a4	Sdc4	0.0819519	0	COL4A4_SDC4	Col4a4 - Sdc4	COLLAGEN	ECM-Receptor	KEGG: mmu04512
DLH_DDC	CD-PC_DDC	Col4a4	Sdc4	0.0767963	0	COL4A4_SDC4	Col4a4 - Sdc4	COLLAGEN	ECM-Receptor	KEGG: mmu04512
DLH_DDC	CD-IC	Col4a4	Sdc4	0.0568557	0	COL4A4_SDC4	Col4a4 - Sdc4	COLLAGEN	ECM-Receptor	KEGG: mmu04512
DLH_DDC	S1	Agrn	Dag1	0.000594458	0	AGRN_DAG1	Agrn - Dag1	AGRN	ECM-Receptor	KEGG: mmu04512
DLH_DDC	S3	Agrn	Dag1	0.000511889	0	AGRN_DAG1	Agrn - Dag1	AGRN	ECM-Receptor	KEGG: mmu04512
DLH_DDC	DLH_HDC	Agrn	Dag1	0.00429216	0	AGRN_DAG1	Agrn - Dag1	AGRN	ECM-Receptor	KEGG: mmu04512
DLH_DDC	DLH_DDC	Agrn	Dag1	0.00195848	0	AGRN_DAG1	Agrn - Dag1	AGRN	ECM-Receptor	KEGG: mmu04512
DLH_DDC	ALH	Agrn	Dag1	0.000621491	0	AGRN_DAG1	Agrn - Dag1	AGRN	ECM-Receptor	KEGG: mmu04512
DLH_DDC	DCT	Agrn	Dag1	0.000885715	0	AGRN_DAG1	Agrn - Dag1	AGRN	ECM-Receptor	KEGG: mmu04512
DLH_DDC	CD-PC_HDC	Agrn	Dag1	0.00300922	0	AGRN_DAG1	Agrn - Dag1	AGRN	ECM-Receptor	KEGG: mmu04512
DLH_DDC	CD-PC_DDC	Agrn	Dag1	0.00272403	0	AGRN_DAG1	Agrn - Dag1	AGRN	ECM-Receptor	KEGG: mmu04512
DLH_DDC	CD-IC	Agrn	Dag1	0.00194265	0	AGRN_DAG1	Agrn - Dag1	AGRN	ECM-Receptor	KEGG: mmu04512
DLH_DDC	S1	App	Cd74	0.0104106	0	APP_CD74	App - Cd74	APP	Cell-Cell Contact	PMID: 19849849
DLH_DDC	DLH_DDC	App	Cd74	0.0187343	0	APP_CD74	App - Cd74	APP	Cell-Cell Contact	PMID: 19849849
DLH_DDC	B Cell_HDC	App	Cd74	0.201146	0	APP_CD74	App - Cd74	APP	Cell-Cell Contact	PMID: 19849849
DLH_DDC	B Cell_DDC	App	Cd74	0.257034	0	APP_CD74	App - Cd74	APP	Cell-Cell Contact	PMID: 19849849
DLH_DDC	Mac_HDC	App	Cd74	0.0338049	0	APP_CD74	App - Cd74	APP	Cell-Cell Contact	PMID: 19849849
DLH_DDC	Mac_DDC	App	Cd74	0.0192265	0	APP_CD74	App - Cd74	APP	Cell-Cell Contact	PMID: 19849849

## Sheet: source as CD-PC_HDC
source	target	ligand	receptor	prob	pval	interaction_name	interaction_name_2	pathway_name	annotation	evidence
CD-PC_HDC	CD-PC_HDC	Kitl	Kit	0.00610318	0	KITL_KIT	Kitl - Kit	KIT	Secreted Signaling	KEGG: mmu04080
CD-PC_HDC	CD-PC_DDC	Kitl	Kit	0.00389086	0	KITL_KIT	Kitl - Kit	KIT	Secreted Signaling	KEGG: mmu04080
CD-PC_HDC	CD-IC	Kitl	Kit	0.000125689	0	KITL_KIT	Kitl - Kit	KIT	Secreted Signaling	KEGG: mmu04080
CD-PC_HDC	EnC_HDC	Kitl	Kit	0.00282696	0	KITL_KIT	Kitl - Kit	KIT	Secreted Signaling	KEGG: mmu04080
CD-PC_HDC	EnC_DDC	Kitl	Kit	0.00438495	0	KITL_KIT	Kitl - Kit	KIT	Secreted Signaling	KEGG: mmu04080
CD-PC_HDC	S1	Col4a4	ITGAV_ITGB8	0.0180127	0	COL4A4_ITGAV_ITGB8	Col4a4 - (Itgav+Itgb8)	COLLAGEN	ECM-Receptor	KEGG: mmu04512
CD-PC_HDC	S3	Col4a4	ITGAV_ITGB8	0.0436797	0	COL4A4_ITGAV_ITGB8	Col4a4 - (Itgav+Itgb8)	COLLAGEN	ECM-Receptor	KEGG: mmu04512
CD-PC_HDC	DLH_DDC	Col4a4	ITGAV_ITGB8	0.0349577	0	COL4A4_ITGAV_ITGB8	Col4a4 - (Itgav+Itgb8)	COLLAGEN	ECM-Receptor	KEGG: mmu04512
CD-PC_HDC	T Cell	Col4a4	Cd44	0.0200429	0	COL4A4_CD44	Col4a4 - Cd44	COLLAGEN	ECM-Receptor	KEGG: mmu04512
CD-PC_HDC	Mac_HDC	Col4a4	Cd44	0.11888	0	COL4A4_CD44	Col4a4 - Cd44	COLLAGEN	ECM-Receptor	KEGG: mmu04512
CD-PC_HDC	Mac_DDC	Col4a4	Cd44	0.125657	0	COL4A4_CD44	Col4a4 - Cd44	COLLAGEN	ECM-Receptor	KEGG: mmu04512
CD-PC_HDC	S1	Col4a4	Sdc4	0.100893	0	COL4A4_SDC4	Col4a4 - Sdc4	COLLAGEN	ECM-Receptor	KEGG: mmu04512
CD-PC_HDC	S3	Col4a4	Sdc4	0.101995	0	COL4A4_SDC4	Col4a4 - Sdc4	COLLAGEN	ECM-Receptor	KEGG: mmu04512
CD-PC_HDC	DLH_HDC	Col4a4	Sdc4	0.14931	0	COL4A4_SDC4	Col4a4 - Sdc4	COLLAGEN	ECM-Receptor	KEGG: mmu04512
CD-PC_HDC	DLH_DDC	Col4a4	Sdc4	0.103425	0	COL4A4_SDC4	Col4a4 - Sdc4	COLLAGEN	ECM-Receptor	KEGG: mmu04512
CD-PC_HDC	ALH	Col4a4	Sdc4	0.0932941	0	COL4A4_SDC4	Col4a4 - Sdc4	COLLAGEN	ECM-Receptor	KEGG: mmu04512
CD-PC_HDC	DCT	Col4a4	Sdc4	0.112656	0	COL4A4_SDC4	Col4a4 - Sdc4	COLLAGEN	ECM-Receptor	KEGG: mmu04512
CD-PC_HDC	CD-PC_HDC	Col4a4	Sdc4	0.148704	0	COL4A4_SDC4	Col4a4 - Sdc4	COLLAGEN	ECM-Receptor	KEGG: mmu04512
CD-PC_HDC	CD-PC_DDC	Col4a4	Sdc4	0.139989	0	COL4A4_SDC4	Col4a4 - Sdc4	COLLAGEN	ECM-Receptor	KEGG: mmu04512
CD-PC_HDC	CD-IC	Col4a4	Sdc4	0.105515	0	COL4A4_SDC4	Col4a4 - Sdc4	COLLAGEN	ECM-Receptor	KEGG: mmu04512
CD-PC_HDC	B Cell_DDC	Col4a4	Sdc4	0.0299665	0	COL4A4_SDC4	Col4a4 - Sdc4	COLLAGEN	ECM-Receptor	KEGG: mmu04512
CD-PC_HDC	DC	Col4a4	Sdc4	0.0421259	0	COL4A4_SDC4	Col4a4 - Sdc4	COLLAGEN	ECM-Receptor	KEGG: mmu04512
CD-PC_HDC	S1	App	Cd74	0.0104391	0	APP_CD74	App - Cd74	APP	Cell-Cell Contact	PMID: 19849849
CD-PC_HDC	DLH_DDC	App	Cd74	0.0187852	0	APP_CD74	App - Cd74	APP	Cell-Cell Contact	PMID: 19849849
CD-PC_HDC	B Cell_HDC	App	Cd74	0.201591	0	APP_CD74	App - Cd74	APP	Cell-Cell Contact	PMID: 19849849
CD-PC_HDC	B Cell_DDC	App	Cd74	0.257563	0	APP_CD74	App - Cd74	APP	Cell-Cell Contact	PMID: 19849849
CD-PC_HDC	Mac_HDC	App	Cd74	0.0338954	0	APP_CD74	App - Cd74	APP	Cell-Cell Contact	PMID: 19849849
CD-PC_HDC	Mac_DDC	App	Cd74	0.0192788	0	APP_CD74	App - Cd74	APP	Cell-Cell Contact	PMID: 19849849
CD-PC_HDC	Mac_DDC	F11r	ITGAL_ITGB2	0.0157061	0	JAM1_ITGAL_ITGB2	Jam1 - (Itgal+Itgb2)	JAM	Cell-Cell Contact	PMID: 11812992
CD-PC_HDC	S1	F11r	F11r	0.0079647	0	F11R_F11R	F11r - F11r	JAM	Cell-Cell Contact	KEGG: mmu04514
CD-PC_HDC	S3	F11r	F11r	0.00747001	0	F11R_F11R	F11r - F11r	JAM	Cell-Cell Contact	KEGG: mmu04514
CD-PC_HDC	DLH_HDC	F11r	F11r	0.00965524	0	F11R_F11R	F11r - F11r	JAM	Cell-Cell Contact	KEGG: mmu04514
CD-PC_HDC	DLH_DDC	F11r	F11r	0.0166099	0	F11R_F11R	F11r - F11r	JAM	Cell-Cell Contact	KEGG: mmu04514
CD-PC_HDC	DCT	F11r	F11r	0.00817603	0	F11R_F11R	F11r - F11r	JAM	Cell-Cell Contact	KEGG: mmu04514
CD-PC_HDC	CD-PC_HDC	F11r	F11r	0.0382442	0	F11R_F11R	F11r - F11r	JAM	Cell-Cell Contact	KEGG: mmu04514
CD-PC_HDC	CD-PC_DDC	F11r	F11r	0.0229844	0	F11R_F11R	F11r - F11r	JAM	Cell-Cell Contact	KEGG: mmu04514
CD-PC_HDC	CD-IC	F11r	F11r	0.0183413	0	F11R_F11R	F11r - F11r	JAM	Cell-Cell Contact	KEGG: mmu04514
CD-PC_HDC	EnC_HDC	F11r	F11r	0.015507	0	F11R_F11R	F11r - F11r	JAM	Cell-Cell Contact	KEGG: mmu04514
CD-PC_HDC	EnC_DDC	F11r	F11r	0.0136285	0	F11R_F11R	F11r - F11r	JAM	Cell-Cell Contact	KEGG: mmu04514
CD-PC_HDC	Mac_HDC	F11r	F11r	0.00427485	0	F11R_F11R	F11r - F11r	JAM	Cell-Cell Contact	KEGG: mmu04514

## Sheet: source as CD-PC_DDC
source	target	ligand	receptor	prob	pval	interaction_name	interaction_name_2	pathway_name	annotation	evidence
CD-PC_DDC	CD-PC_HDC	Kitl	Kit	0.00399692	0	KITL_KIT	Kitl - Kit	KIT	Secreted Signaling	KEGG: mmu04080
CD-PC_DDC	CD-PC_DDC	Kitl	Kit	0.00254614	0	KITL_KIT	Kitl - Kit	KIT	Secreted Signaling	KEGG: mmu04080
CD-PC_DDC	CD-IC	Kitl	Kit	8.21422e-05	0	KITL_KIT	Kitl - Kit	KIT	Secreted Signaling	KEGG: mmu04080
CD-PC_DDC	EnC_HDC	Kitl	Kit	0.00184925	0	KITL_KIT	Kitl - Kit	KIT	Secreted Signaling	KEGG: mmu04080
CD-PC_DDC	EnC_DDC	Kitl	Kit	0.00286995	0	KITL_KIT	Kitl - Kit	KIT	Secreted Signaling	KEGG: mmu04080
CD-PC_DDC	S1	Col4a4	ITGAV_ITGB8	0.0146953	0	COL4A4_ITGAV_ITGB8	Col4a4 - (Itgav+Itgb8)	COLLAGEN	ECM-Receptor	KEGG: mmu04512
CD-PC_DDC	S3	Col4a4	ITGAV_ITGB8	0.0358077	0	COL4A4_ITGAV_ITGB8	Col4a4 - (Itgav+Itgb8)	COLLAGEN	ECM-Receptor	KEGG: mmu04512
CD-PC_DDC	DLH_DDC	Col4a4	ITGAV_ITGB8	0.0286105	0	COL4A4_ITGAV_ITGB8	Col4a4 - (Itgav+Itgb8)	COLLAGEN	ECM-Receptor	KEGG: mmu04512
CD-PC_DDC	T Cell	Col4a4	Cd44	0.0163579	0	COL4A4_CD44	Col4a4 - Cd44	COLLAGEN	ECM-Receptor	KEGG: mmu04512
CD-PC_DDC	Mac_HDC	Col4a4	Cd44	0.0988563	0	COL4A4_CD44	Col4a4 - Cd44	COLLAGEN	ECM-Receptor	KEGG: mmu04512
CD-PC_DDC	Mac_DDC	Col4a4	Cd44	0.104627	0	COL4A4_CD44	Col4a4 - Cd44	COLLAGEN	ECM-Receptor	KEGG: mmu04512
CD-PC_DDC	S1	Col4a4	Sdc4	0.0836118	0	COL4A4_SDC4	Col4a4 - Sdc4	COLLAGEN	ECM-Receptor	KEGG: mmu04512
CD-PC_DDC	S2	Col4a4	Sdc4	0.0175586	0.01	COL4A4_SDC4	Col4a4 - Sdc4	COLLAGEN	ECM-Receptor	KEGG: mmu04512
CD-PC_DDC	S3	Col4a4	Sdc4	0.0845428	0	COL4A4_SDC4	Col4a4 - Sdc4	COLLAGEN	ECM-Receptor	KEGG: mmu04512
CD-PC_DDC	DLH_HDC	Col4a4	Sdc4	0.124887	0	COL4A4_SDC4	Col4a4 - Sdc4	COLLAGEN	ECM-Receptor	KEGG: mmu04512
CD-PC_DDC	DLH_DDC	Col4a4	Sdc4	0.0857509	0	COL4A4_SDC4	Col4a4 - Sdc4	COLLAGEN	ECM-Receptor	KEGG: mmu04512
CD-PC_DDC	ALH	Col4a4	Sdc4	0.0772024	0	COL4A4_SDC4	Col4a4 - Sdc4	COLLAGEN	ECM-Receptor	KEGG: mmu04512
CD-PC_DDC	DCT	Col4a4	Sdc4	0.0935691	0	COL4A4_SDC4	Col4a4 - Sdc4	COLLAGEN	ECM-Receptor	KEGG: mmu04512
CD-PC_DDC	CD-PC_HDC	Col4a4	Sdc4	0.124365	0	COL4A4_SDC4	Col4a4 - Sdc4	COLLAGEN	ECM-Receptor	KEGG: mmu04512
CD-PC_DDC	CD-PC_DDC	Col4a4	Sdc4	0.116881	0	COL4A4_SDC4	Col4a4 - Sdc4	COLLAGEN	ECM-Receptor	KEGG: mmu04512
CD-PC_DDC	CD-IC	Col4a4	Sdc4	0.0875191	0	COL4A4_SDC4	Col4a4 - Sdc4	COLLAGEN	ECM-Receptor	KEGG: mmu04512
CD-PC_DDC	B Cell_HDC	Col4a4	Sdc4	0.0160096	0.03	COL4A4_SDC4	Col4a4 - Sdc4	COLLAGEN	ECM-Receptor	KEGG: mmu04512
CD-PC_DDC	B Cell_DDC	Col4a4	Sdc4	0.0245026	0.01	COL4A4_SDC4	Col4a4 - Sdc4	COLLAGEN	ECM-Receptor	KEGG: mmu04512
CD-PC_DDC	DC	Col4a4	Sdc4	0.0345238	0	COL4A4_SDC4	Col4a4 - Sdc4	COLLAGEN	ECM-Receptor	KEGG: mmu04512
CD-PC_DDC	S1	App	Cd74	0.00893731	0	APP_CD74	App - Cd74	APP	Cell-Cell Contact	PMID: 19849849
CD-PC_DDC	DLH_DDC	App	Cd74	0.0161022	0	APP_CD74	App - Cd74	APP	Cell-Cell Contact	PMID: 19849849
CD-PC_DDC	B Cell_HDC	App	Cd74	0.177523	0	APP_CD74	App - Cd74	APP	Cell-Cell Contact	PMID: 19849849
CD-PC_DDC	B Cell_DDC	App	Cd74	0.228726	0	APP_CD74	App - Cd74	APP	Cell-Cell Contact	PMID: 19849849
CD-PC_DDC	Mac_HDC	App	Cd74	0.0291183	0	APP_CD74	App - Cd74	APP	Cell-Cell Contact	PMID: 19849849
CD-PC_DDC	Mac_DDC	App	Cd74	0.0165265	0	APP_CD74	App - Cd74	APP	Cell-Cell Contact	PMID: 19849849
CD-PC_DDC	Mac_DDC	F11r	ITGAL_ITGB2	0.00935182	0	JAM1_ITGAL_ITGB2	Jam1 - (Itgal+Itgb2)	JAM	Cell-Cell Contact	PMID: 11812992
CD-PC_DDC	S1	F11r	F11r	0.00472734	0	F11R_F11R	F11r - F11r	JAM	Cell-Cell Contact	KEGG: mmu04514
CD-PC_DDC	S3	F11r	F11r	0.00443282	0	F11R_F11R	F11r - F11r	JAM	Cell-Cell Contact	KEGG: mmu04514
CD-PC_DDC	DLH_HDC	F11r	F11r	0.0057347	0	F11R_F11R	F11r - F11r	JAM	Cell-Cell Contact	KEGG: mmu04514
CD-PC_DDC	DLH_DDC	F11r	F11r	0.00989363	0	F11R_F11R	F11r - F11r	JAM	Cell-Cell Contact	KEGG: mmu04514
CD-PC_DDC	DCT	F11r	F11r	0.00485319	0	F11R_F11R	F11r - F11r	JAM	Cell-Cell Contact	KEGG: mmu04514
CD-PC_DDC	CD-PC_HDC	F11r	F11r	0.0229844	0	F11R_F11R	F11r - F11r	JAM	Cell-Cell Contact	KEGG: mmu04514
CD-PC_DDC	CD-PC_DDC	F11r	F11r	0.0137266	0	F11R_F11R	F11r - F11r	JAM	Cell-Cell Contact	KEGG: mmu04514
CD-PC_DDC	CD-IC	F11r	F11r	0.0109327	0	F11R_F11R	F11r - F11r	JAM	Cell-Cell Contact	KEGG: mmu04514
CD-PC_DDC	EnC_HDC	F11r	F11r	0.00923248	0	F11R_F11R	F11r - F11r	JAM	Cell-Cell Contact	KEGG: mmu04514
CD-PC_DDC	EnC_DDC	F11r	F11r	0.0081078	0	F11R_F11R	F11r - F11r	JAM	Cell-Cell Contact	KEGG: mmu04514

## Sheet: source as EnC_HDC
source	target	ligand	receptor	prob	pval	interaction_name	interaction_name_2	pathway_name	annotation	evidence
EnC_HDC	EnC_HDC	Vegfa	FLT1_KDR	0.0235178	0	VEGFA_VEGFR1R2	Vegfa - Vegfr1r2	VEGF	Secreted Signaling	PMID: 16633338
EnC_HDC	EnC_DDC	Vegfa	FLT1_KDR	0.0274069	0	VEGFA_VEGFR1R2	Vegfa - Vegfr1r2	VEGF	Secreted Signaling	PMID: 16633338
EnC_HDC	S1	Nampt	Insr	0.00709175	0	NAMPT_INSR	Nampt - Insr	VISFATIN	Secreted Signaling	PMID: 28490838
EnC_HDC	S3	Nampt	Insr	0.0068574	0	NAMPT_INSR	Nampt - Insr	VISFATIN	Secreted Signaling	PMID: 28490838
EnC_HDC	CD-PC_HDC	Nampt	Insr	0.00520517	0.03	NAMPT_INSR	Nampt - Insr	VISFATIN	Secreted Signaling	PMID: 28490838
EnC_HDC	S1	Col4a4	ITGAV_ITGB8	0.00137135	0	COL4A4_ITGAV_ITGB8	Col4a4 - (Itgav+Itgb8)	COLLAGEN	ECM-Receptor	KEGG: mmu04512
EnC_HDC	S3	Col4a4	ITGAV_ITGB8	0.00340775	0	COL4A4_ITGAV_ITGB8	Col4a4 - (Itgav+Itgb8)	COLLAGEN	ECM-Receptor	KEGG: mmu04512
EnC_HDC	T Cell	Col4a4	Cd44	0.00152884	0	COL4A4_CD44	Col4a4 - Cd44	COLLAGEN	ECM-Receptor	KEGG: mmu04512
EnC_HDC	Mac_HDC	Col4a4	Cd44	0.0099996	0	COL4A4_CD44	Col4a4 - Cd44	COLLAGEN	ECM-Receptor	KEGG: mmu04512
EnC_HDC	Mac_DDC	Col4a4	Cd44	0.0106447	0	COL4A4_CD44	Col4a4 - Cd44	COLLAGEN	ECM-Receptor	KEGG: mmu04512

## Sheet: source as EnC_DDC
source	target	ligand	receptor	prob	pval	interaction_name	interaction_name_2	pathway_name	annotation	evidence
EnC_DDC	S1	Tgfb1	TGFbR1_R2	0.000599019	0	TGFB1_TGFBR1_TGFBR2	Tgfb1 - (Tgfbr1+Tgfbr2)	TGFb	Secreted Signaling	KEGG: mmu04350
EnC_DDC	S3	Tgfb1	TGFbR1_R2	0.000559952	0	TGFB1_TGFBR1_TGFBR2	Tgfb1 - (Tgfbr1+Tgfbr2)	TGFb	Secreted Signaling	KEGG: mmu04350
EnC_DDC	DLH_HDC	Tgfb1	TGFbR1_R2	0.000915144	0	TGFB1_TGFBR1_TGFBR2	Tgfb1 - (Tgfbr1+Tgfbr2)	TGFb	Secreted Signaling	KEGG: mmu04350
EnC_DDC	DLH_DDC	Tgfb1	TGFbR1_R2	0.00160254	0	TGFB1_TGFBR1_TGFBR2	Tgfb1 - (Tgfbr1+Tgfbr2)	TGFb	Secreted Signaling	KEGG: mmu04350
EnC_DDC	DCT	Tgfb1	TGFbR1_R2	0.000351602	0	TGFB1_TGFBR1_TGFBR2	Tgfb1 - (Tgfbr1+Tgfbr2)	TGFb	Secreted Signaling	KEGG: mmu04350
EnC_DDC	CD-PC_HDC	Tgfb1	TGFbR1_R2	0.00328618	0	TGFB1_TGFBR1_TGFBR2	Tgfb1 - (Tgfbr1+Tgfbr2)	TGFb	Secreted Signaling	KEGG: mmu04350
EnC_DDC	CD-PC_DDC	Tgfb1	TGFbR1_R2	0.00189905	0	TGFB1_TGFBR1_TGFBR2	Tgfb1 - (Tgfbr1+Tgfbr2)	TGFb	Secreted Signaling	KEGG: mmu04350
EnC_DDC	CD-IC	Tgfb1	TGFbR1_R2	0.000487497	0	TGFB1_TGFBR1_TGFBR2	Tgfb1 - (Tgfbr1+Tgfbr2)	TGFb	Secreted Signaling	KEGG: mmu04350
EnC_DDC	EnC_HDC	Tgfb1	TGFbR1_R2	0.000945575	0	TGFB1_TGFBR1_TGFBR2	Tgfb1 - (Tgfbr1+Tgfbr2)	TGFb	Secreted Signaling	KEGG: mmu04350
EnC_DDC	EnC_DDC	Tgfb1	TGFbR1_R2	0.0023394	0	TGFB1_TGFBR1_TGFBR2	Tgfb1 - (Tgfbr1+Tgfbr2)	TGFb	Secreted Signaling	KEGG: mmu04350
EnC_DDC	T Cell	Tgfb1	TGFbR1_R2	0.00112921	0	TGFB1_TGFBR1_TGFBR2	Tgfb1 - (Tgfbr1+Tgfbr2)	TGFb	Secreted Signaling	KEGG: mmu04350
EnC_DDC	B Cell_DDC	Tgfb1	TGFbR1_R2	0.00120827	0	TGFB1_TGFBR1_TGFBR2	Tgfb1 - (Tgfbr1+Tgfbr2)	TGFb	Secreted Signaling	KEGG: mmu04350
EnC_DDC	Mac_HDC	Tgfb1	TGFbR1_R2	0.0015544	0	TGFB1_TGFBR1_TGFBR2	Tgfb1 - (Tgfbr1+Tgfbr2)	TGFb	Secreted Signaling	KEGG: mmu04350
EnC_DDC	Mac_DDC	Tgfb1	TGFbR1_R2	0.00104761	0	TGFB1_TGFBR1_TGFBR2	Tgfb1 - (Tgfbr1+Tgfbr2)	TGFb	Secreted Signaling	KEGG: mmu04350
EnC_DDC	DC	Tgfb1	TGFbR1_R2	0.000767302	0	TGFB1_TGFBR1_TGFBR2	Tgfb1 - (Tgfbr1+Tgfbr2)	TGFb	Secreted Signaling	KEGG: mmu04350

## Sheet: source as B Cell_HDC
source	target	ligand	receptor	prob	pval	interaction_name	interaction_name_2	pathway_name	annotation	evidence
B Cell_HDC	T Cell	H2-Ab1	Cd4	0.0207545	0	H2-AB1_CD4	H2-ab1 - Cd4	MHC-II	Cell-Cell Contact	KEGG: mmu04514
B Cell_HDC	Mac_HDC	H2-Ab1	Cd4	0.00125413	0	H2-AB1_CD4	H2-ab1 - Cd4	MHC-II	Cell-Cell Contact	KEGG: mmu04514
B Cell_HDC	DC	H2-Ab1	Cd4	0.0025592	0	H2-AB1_CD4	H2-ab1 - Cd4	MHC-II	Cell-Cell Contact	KEGG: mmu04514
B Cell_HDC	T Cell	H2-Ob	Cd4	0.00370692	0	H2-OB_CD4	H2-ob - Cd4	MHC-II	Cell-Cell Contact	KEGG: mmu04514
B Cell_HDC	Mac_HDC	H2-Ob	Cd4	0.000220392	0	H2-OB_CD4	H2-ob - Cd4	MHC-II	Cell-Cell Contact	KEGG: mmu04514
B Cell_HDC	DC	H2-Ob	Cd4	0.000450222	0	H2-OB_CD4	H2-ob - Cd4	MHC-II	Cell-Cell Contact	KEGG: mmu04514

## Sheet: source as B Cell_DDC
source	target	ligand	receptor	prob	pval	interaction_name	interaction_name_2	pathway_name	annotation	evidence
B Cell_DDC	S1	Tgfb1	TGFbR1_R2	0.000639955	0	TGFB1_TGFBR1_TGFBR2	Tgfb1 - (Tgfbr1+Tgfbr2)	TGFb	Secreted Signaling	KEGG: mmu04350
B Cell_DDC	S3	Tgfb1	TGFbR1_R2	0.000598218	0	TGFB1_TGFBR1_TGFBR2	Tgfb1 - (Tgfbr1+Tgfbr2)	TGFb	Secreted Signaling	KEGG: mmu04350
B Cell_DDC	DLH_HDC	Tgfb1	TGFbR1_R2	0.000977683	0	TGFB1_TGFBR1_TGFBR2	Tgfb1 - (Tgfbr1+Tgfbr2)	TGFb	Secreted Signaling	KEGG: mmu04350
B Cell_DDC	DLH_DDC	Tgfb1	TGFbR1_R2	0.00171206	0	TGFB1_TGFBR1_TGFBR2	Tgfb1 - (Tgfbr1+Tgfbr2)	TGFb	Secreted Signaling	KEGG: mmu04350
B Cell_DDC	DCT	Tgfb1	TGFbR1_R2	0.000375629	0	TGFB1_TGFBR1_TGFBR2	Tgfb1 - (Tgfbr1+Tgfbr2)	TGFb	Secreted Signaling	KEGG: mmu04350
B Cell_DDC	CD-PC_HDC	Tgfb1	TGFbR1_R2	0.00351076	0	TGFB1_TGFBR1_TGFBR2	Tgfb1 - (Tgfbr1+Tgfbr2)	TGFb	Secreted Signaling	KEGG: mmu04350
B Cell_DDC	CD-PC_DDC	Tgfb1	TGFbR1_R2	0.00202883	0	TGFB1_TGFBR1_TGFBR2	Tgfb1 - (Tgfbr1+Tgfbr2)	TGFb	Secreted Signaling	KEGG: mmu04350
B Cell_DDC	CD-IC	Tgfb1	TGFbR1_R2	0.000520811	0	TGFB1_TGFBR1_TGFBR2	Tgfb1 - (Tgfbr1+Tgfbr2)	TGFb	Secreted Signaling	KEGG: mmu04350
B Cell_DDC	EnC_HDC	Tgfb1	TGFbR1_R2	0.00101019	0	TGFB1_TGFBR1_TGFBR2	Tgfb1 - (Tgfbr1+Tgfbr2)	TGFb	Secreted Signaling	KEGG: mmu04350
B Cell_DDC	EnC_DDC	Tgfb1	TGFbR1_R2	0.00249927	0	TGFB1_TGFBR1_TGFBR2	Tgfb1 - (Tgfbr1+Tgfbr2)	TGFb	Secreted Signaling	KEGG: mmu04350
B Cell_DDC	T Cell	Tgfb1	TGFbR1_R2	0.00120638	0	TGFB1_TGFBR1_TGFBR2	Tgfb1 - (Tgfbr1+Tgfbr2)	TGFb	Secreted Signaling	KEGG: mmu04350
B Cell_DDC	B Cell_DDC	Tgfb1	TGFbR1_R2	0.00129084	0	TGFB1_TGFBR1_TGFBR2	Tgfb1 - (Tgfbr1+Tgfbr2)	TGFb	Secreted Signaling	KEGG: mmu04350
B Cell_DDC	Mac_HDC	Tgfb1	TGFbR1_R2	0.00166062	0	TGFB1_TGFBR1_TGFBR2	Tgfb1 - (Tgfbr1+Tgfbr2)	TGFb	Secreted Signaling	KEGG: mmu04350
B Cell_DDC	Mac_DDC	Tgfb1	TGFbR1_R2	0.00111921	0	TGFB1_TGFBR1_TGFBR2	Tgfb1 - (Tgfbr1+Tgfbr2)	TGFb	Secreted Signaling	KEGG: mmu04350
B Cell_DDC	DC	Tgfb1	TGFbR1_R2	0.000819738	0	TGFB1_TGFBR1_TGFBR2	Tgfb1 - (Tgfbr1+Tgfbr2)	TGFb	Secreted Signaling	KEGG: mmu04350
B Cell_DDC	T Cell	H2-Ab1	Cd4	0.0343543	0	H2-AB1_CD4	H2-ab1 - Cd4	MHC-II	Cell-Cell Contact	KEGG: mmu04514
B Cell_DDC	Mac_HDC	H2-Ab1	Cd4	0.00210337	0	H2-AB1_CD4	H2-ab1 - Cd4	MHC-II	Cell-Cell Contact	KEGG: mmu04514
B Cell_DDC	DC	H2-Ab1	Cd4	0.00428838	0	H2-AB1_CD4	H2-ab1 - Cd4	MHC-II	Cell-Cell Contact	KEGG: mmu04514
B Cell_DDC	T Cell	H2-Ob	Cd4	0.0203494	0	H2-OB_CD4	H2-ob - Cd4	MHC-II	Cell-Cell Contact	KEGG: mmu04514
B Cell_DDC	Mac_HDC	H2-Ob	Cd4	0.00122917	0	H2-OB_CD4	H2-ob - Cd4	MHC-II	Cell-Cell Contact	KEGG: mmu04514
B Cell_DDC	DC	H2-Ob	Cd4	0.00250834	0	H2-OB_CD4	H2-ob - Cd4	MHC-II	Cell-Cell Contact	KEGG: mmu04514
B Cell_DDC	EnC_HDC	Sell	Cd34	0.0224361	0	SELL_CD34	Sell - Cd34	SELL	Cell-Cell Contact	PMID: 7692600; PMID: 8977216
B Cell_DDC	EnC_DDC	Sell	Cd34	0.0209467	0	SELL_CD34	Sell - Cd34	SELL	Cell-Cell Contact	PMID: 7692600; PMID: 8977216

## Sheet: source as Mac_HDC
source	target	ligand	receptor	prob	pval	interaction_name	interaction_name_2	pathway_name	annotation	evidence
Mac_HDC	Mac_HDC	Mif	CD74_CD44	0.0292633	0	MIF_CD74_CD44	Mif - (Cd74+Cd44)	MIF	Secreted Signaling	PMID: 29637711; PMID: 26175090
Mac_HDC	Mac_DDC	Mif	CD74_CD44	0.0189468	0	MIF_CD74_CD44	Mif - (Cd74+Cd44)	MIF	Secreted Signaling	PMID: 29637711; PMID: 26175090
Mac_HDC	S3	Spp1	ITGAV_ITGB6	0.00568755	0	SPP1_ITGAV_ITGB6	Spp1 - (Itgav+Itgb6)	SPP1	Secreted Signaling	PMID: 21907263
Mac_HDC	DLH_DDC	Spp1	ITGAV_ITGB6	0.00536743	0.01	SPP1_ITGAV_ITGB6	Spp1 - (Itgav+Itgb6)	SPP1	Secreted Signaling	PMID: 21907263
Mac_HDC	CD-PC_HDC	Spp1	ITGAV_ITGB6	0.00299519	0	SPP1_ITGAV_ITGB6	Spp1 - (Itgav+Itgb6)	SPP1	Secreted Signaling	PMID: 21907263
Mac_HDC	CD-PC_DDC	Spp1	ITGAV_ITGB6	0.00418675	0	SPP1_ITGAV_ITGB6	Spp1 - (Itgav+Itgb6)	SPP1	Secreted Signaling	PMID: 21907263
Mac_HDC	CD-IC	Spp1	ITGAV_ITGB6	0.00603318	0	SPP1_ITGAV_ITGB6	Spp1 - (Itgav+Itgb6)	SPP1	Secreted Signaling	PMID: 21907263
Mac_HDC	S1	Col4a3	ITGA1_ITGB1	0.000499571	0	COL4A3_ITGA1_ITGB1	Col4a3 - (Itga1+Itgb1)	COLLAGEN	ECM-Receptor	KEGG: mmu04512
Mac_HDC	S3	Col4a3	ITGA1_ITGB1	0.000503734	0	COL4A3_ITGA1_ITGB1	Col4a3 - (Itga1+Itgb1)	COLLAGEN	ECM-Receptor	KEGG: mmu04512
Mac_HDC	DLH_DDC	Col4a3	ITGA1_ITGB1	0.001403	0	COL4A3_ITGA1_ITGB1	Col4a3 - (Itga1+Itgb1)	COLLAGEN	ECM-Receptor	KEGG: mmu04512
Mac_HDC	CD-PC_HDC	Col4a3	ITGA1_ITGB1	0.000424807	0.02	COL4A3_ITGA1_ITGB1	Col4a3 - (Itga1+Itgb1)	COLLAGEN	ECM-Receptor	KEGG: mmu04512
Mac_HDC	CD-PC_DDC	Col4a3	ITGA1_ITGB1	0.000671947	0	COL4A3_ITGA1_ITGB1	Col4a3 - (Itga1+Itgb1)	COLLAGEN	ECM-Receptor	KEGG: mmu04512
Mac_HDC	CD-IC	Col4a3	ITGA1_ITGB1	0.000450867	0	COL4A3_ITGA1_ITGB1	Col4a3 - (Itga1+Itgb1)	COLLAGEN	ECM-Receptor	KEGG: mmu04512
Mac_HDC	EnC_HDC	Col4a3	ITGA1_ITGB1	0.00109143	0.05	COL4A3_ITGA1_ITGB1	Col4a3 - (Itga1+Itgb1)	COLLAGEN	ECM-Receptor	KEGG: mmu04512
Mac_HDC	EnC_DDC	Col4a3	ITGA1_ITGB1	0.000744023	0.02	COL4A3_ITGA1_ITGB1	Col4a3 - (Itga1+Itgb1)	COLLAGEN	ECM-Receptor	KEGG: mmu04512
Mac_HDC	DC	Col4a3	ITGA1_ITGB1	7.17443e-05	0	COL4A3_ITGA1_ITGB1	Col4a3 - (Itga1+Itgb1)	COLLAGEN	ECM-Receptor	KEGG: mmu04512
Mac_HDC	Mac_DDC	F11r	ITGAL_ITGB2	0.0017198	0	JAM1_ITGAL_ITGB2	Jam1 - (Itgal+Itgb2)	JAM	Cell-Cell Contact	PMID: 11812992
Mac_HDC	CD-PC_HDC	F11r	F11r	0.00427485	0	F11R_F11R	F11r - F11r	JAM	Cell-Cell Contact	KEGG: mmu04514
Mac_HDC	CD-IC	F11r	F11r	0.00201314	0.04	F11R_F11R	F11r - F11r	JAM	Cell-Cell Contact	KEGG: mmu04514
Mac_HDC	EnC_DDC	F11r	F11r	0.0014895	0.05	F11R_F11R	F11r - F11r	JAM	Cell-Cell Contact	KEGG: mmu04514

## Sheet: source as Mac_DDC
source	target	ligand	receptor	prob	pval	interaction_name	interaction_name_2	pathway_name	annotation	evidence
Mac_DDC	Mac_HDC	Mif	CD74_CD44	0.00540289	0	MIF_CD74_CD44	Mif - (Cd74+Cd44)	MIF	Secreted Signaling	PMID: 29637711; PMID: 26175090
Mac_DDC	Mac_DDC	Mif	CD74_CD44	0.0034681	0	MIF_CD74_CD44	Mif - (Cd74+Cd44)	MIF	Secreted Signaling	PMID: 29637711; PMID: 26175090

[truncated: 7 more sheets: target as DLH_HDC, target as DLH_DDC, target as CD-PC_HDC, target as CD-PC_DDC, target as B Cell_HDC, target as B Cell_DDC, target as Mac_HDC]
