# Supplementary material for: Single-Cell Transcriptional Landscape Reveals the Regulatory Network and Its Heterogeneity of Renal Mitochondrial Damages in Diabetic Kidney Disease
Source: Int J Mol Sci. 2023 Aug 31;24(17):13502. doi: 10.3390/ijms241713502 (PMC10487965; doi:10.3390/ijms241713502)
Supplement: Supplementary file 1 [file ijms-24-13502-s001.zip › Table S6.xlsx]

## Sheet: count data of droplets
	S1	S2	S3	T Cell	ALH	DCT	CD-IC	CD-PC	Mac	EnC	B Cell	DLH	DC
Doublet	2821	696	6287	634	1	5	1	2	260	50	93	5	8
Singlet	5652	23651	6098	3937	2931	2664	725	544	155	466	214	204	155
